# Supplementary material for: Creating political priority for micronutrient deficiencies: a qualitative case study from Senegal
Source: PubMed Central journal article supplement — BMJ Open. 2014 Aug 8;4(8):e004784. doi: 10.1136/bmjopen-2014-004784 (PMC4127923; doi:10.1136/bmjopen-2014-004784), 2014-08-08
Supplement: bmjopen-2014-004784.draft_revisions.pdf [file bmjopen-2014-004784.draft_revisions.pdf]

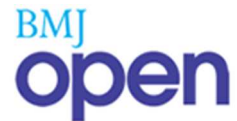

## Creating political priority for micronutrient deficiencies: A qualitative study

|                                 |                                                                                   |
|---------------------------------|-----------------------------------------------------------------------------------|
| Journal:                        | <i>BMJ Open</i>                                                                   |
| Manuscript ID:                  | bmjopen-2014-004784                                                               |
| Article Type:                   | Research                                                                          |
| Date Submitted by the Author:   | 02-Jan-2014                                                                       |
| Complete List of Authors:       | Balarajan, Yarlini                                                                |
| <b>Primary Subject Heading</b>: | Global health                                                                     |
| Secondary Subject Heading:      | Global health, Nutrition and metabolism, Qualitative research, Health policy      |
| Keywords:                       | micronutrients, political priority, agenda setting, Nutrition < TROPICAL MEDICINE |
|                                 |                                                                                   |

SCHOLARONE™  
Manuscripts

Peer review only

1  
2  
3  
4  
5  
6 **Title:** Creating political priority for micronutrient deficiencies: A qualitative study  
7  
8  
9

10 **Author\*:** Yarlini Balarajan  
11  
12

13  
14  
15 **Author's Affiliation:** Department of Global Health and Population, Harvard School of Public  
16  
17 Health. Boston, MA, 02115. USA  
18

19  
20 [ybalaraj@hsph.harvard.edu](mailto:ybalaraj@hsph.harvard.edu); [ybalarajan@gmail.com](mailto:ybalarajan@gmail.com)  
21

22 \*corresponding author  
23  
24

25  
26  
27 **Running head:** political priority for micronutrient deficiencies  
28  
29

30  
31  
32 **Keywords:** micronutrients, political priority, agenda setting, policy process, nutrition,  
33  
34  
35  
36  
37  
38  
39  
40  
41  
42  
43  
44  
45  
46  
47  
48  
49  
50  
51  
52  
53  
54  
55  
56  
57  
58  
59  
60

## ARTICLE SUMMARY

### What is already known

- Micronutrient deficiencies remain a major global health issue affecting women and child in several low and middle income countries (over 50 million disability-adjusted life years lost globally).
- No previous studies have systematically explored what factors influence the agenda-setting process for micronutrient deficiencies, nor the level of political priority afforded to this issue at the national level.

### What this study adds

- This study identifies several factors facilitating and impeding the level of political prioritization for micronutrient deficiencies at the national level. It offers some explanation as to why the issue of micronutrient deficiencies has struggled to gain political attention in Senegal.
- Greater attention to the factors affecting agenda setting can be used to devise political strategies to help prioritize micronutrient deficiencies on national agendas.

### Strengths and limitations of this study

- To the author's knowledge, this is the first exploratory study examining the political prioritization process for the micronutrient deficiencies.
- This study draws on primary data collected from key stakeholders involved in the policy process, and relates the study's findings to the existing theoretical literature to yield some additional insights.
- As with any qualitative case study, it is not possible to generalize the findings to other settings and contexts.
- The sample size was not large; however, maximum-variation sampling was applied to recruitment to ensure representation from all the key stakeholders from within and outside national government.

## ABSTRACT

**Objectives:** To examine what factors influence the agenda-setting process for micronutrient deficiencies (MND) and the level of political priority afforded to MNDs.

**Design:** Qualitative case study employing process-tracing, informed by primary data collected from semi-structured interviews with policymakers.

**Setting:** Dakar, Senegal

**Results:** Several facilitating and impeding factors affecting the level of political prioritization for MNDs were identified. Facilitating factors included multiple stakeholders, each with their strengths and capabilities, to collectively advocate for MNDs; availability of indicators to quantify issue severity and raise awareness; and transnational advocacy activities around micronutrients. Impeding factors included lack of awareness among policymakers and civil society about MNDs; issue complexity, with the need for coordinated multisectoral response; lack of resources for competing issues trapping the issue in a 'low priority' cycle; lack of a policy champion to advocate for the issue; and the challenge of demonstrating the effectiveness of interventions to support advocacy efforts.

### Conclusions:

This study gives insight into the political prioritization process for micronutrient deficiencies from the perspective of key experts working at the national level in Senegal. In doing so, the study offers some explanation as to why the issue of MNDs has struggled to gain political attention and make it onto the national policy agenda. Moving forward, greater awareness of the factors affecting agenda setting for MNDs may help to devise political strategies to champion this development issue in countries with high burdens of micronutrient deficiencies.

## INTRODUCTION

Vitamin and mineral deficiencies are a leading cause of ill-health, affecting vulnerable populations, especially children and women of reproductive age in low and middle-income countries.[1] Deficiencies of iodine, iron, folic acid, zinc and Vitamin A are sometimes collectively referred to by the term “hidden hunger”[2] – this term reflects the insidious clinical presentation which can go unnoticed by individuals suffering from these micronutrient deficiencies (MNDs). MNDs are associated with adverse health and development consequences, contributing to maternal and child mortality and morbidity, physical and intellectual impairment, and loss of work productivity, attributing to over 50 million disability-adjusted life years lost globally.[3,4]

Despite the existence of low-cost effective interventions to address MNDs, progress towards reducing this MND disease burden remains limited,[2] with mixed progress both within and between countries.[5] Yet, in terms of benefit: cost ratios, interventions to address MND are deemed the most favorable of all health and development interventions available to improve global welfare.[6] This raises the interesting and important question of why the issue of MNDs has not generated political priority among national policymakers despite the high disease burden and favorable policy solutions. To the author’s knowledge, no previous studies have examined this issue.

Therefore, this study set out to explore the factors determining the national political priority afforded to MND. Based on fieldwork conducted in Senegal, it explores how key experts working in nutrition and health perceive the level of political priority afforded to micronutrients in the national health agenda in Senegal, and what factors they consider affect the process of agenda setting for this issue.

## Agenda setting for global health issues

*“It all depends on politics”*

– Study participant, Dakar, Senegal

Health policy in low and middle-income countries operates in an increasingly complex environment where global and national actors interact across borders to shape policy and its implementation. The growing numbers of actors, increased connectivity and networks, and changing inter-organizational relationships are altering the policy process.[7] A key part of this policy process is agenda setting - the first stage of the policy cycle -which describes the factors that influence how issues are defined and prioritized on the policy agenda. Expectedly, there is variation of the priority and attention granted to different global health issues. However, it is not fully understood why and what factors drive this variation.[8]

Political scientists and public policy scholars have examined the process by which issues are championed and receive political attention in the agenda-setting stage. Many of these have drawn on Kingdon’s theory of agenda setting, where the convergence of three different ‘streams’ (problem, policy and politics) increase the likelihood of policy success.[9] More recently, Shiffman and Smith proposed a framework for determinants of political priority for global health initiatives.[8] Not theoretically driven, this framework identified 11 variables associated with increased likelihood that a given issue will be placed high on a policy agenda, related to ‘actor power’, ‘ideas’, ‘political context’ and ‘issue characteristics,’ drawing from factors inductively derived from study of the issue of maternal mortality across five countries.[10] This work has led to studies that have explored agenda-setting processes related to different global health issues, such as maternal health, newborn health, health systems strengthening and family planning.[8,11,12,13,14,15]

1  
2  
3  
4 By increasing our understanding of the factors influencing agenda setting, it may be  
5 possible to identify opportunities to advance reform and affect the political policy process.  
6  
7 Furthermore, by devising political strategies, there is potential to better advocate for hitherto  
8 neglected global health issues, such as MNDs. Thus, this knowledge may be one way of  
9 responding to the ‘Call to Action’ from the global health and nutrition community to develop and  
10 sustain priority for MNDs on the agenda of national governments.[5] In 2009, a ‘*United Call to*  
11 *Action on Vitamin and Mineral Deficiencies*’ was endorsed by multiple stakeholders working in  
12 the field, which set forth the case for investing in addressing MNDs and united global advocacy  
13 efforts. The global launch was followed by national launches in four countries, Bangladesh,  
14 Kenya, Pakistan and Senegal, in an attempt to increase commitment for MNDs and develop  
15 sustainable partnerships between national government and other stakeholders.[16] The case  
16 study of Senegal was selected for this study as this was one of the countries where a national  
17 launch of the global call to action was held, providing an opportunity to explore how global  
18 agenda-setting processes influence the national policy process.  
19  
20  
21  
22  
23  
24  
25  
26  
27  
28  
29  
30  
31  
32  
33  
34  
35  
36  
37  
38

## 39 METHODS

40  
41 This case study used process-tracing, a qualitative method used by political and social  
42 scientists, that can be applied to assess complex processes where multiple factors may interact to  
43 cause effects.[17] Process-tracing is appropriate for within-case analysis and particularly useful  
44 for examining complex issues, such as the policy process; and understanding and exploring  
45 historical events, such as the national launch of a global ‘Call to Action’ on micronutrient  
46 deficiencies.  
47  
48  
49  
50  
51  
52  
53  
54  
55  
56  
57  
58  
59  
60

1  
2  
3 Multiple data sources were triangulated to minimize systematic bias: primary data  
4 collected from semi-structured interviews with high-level representatives from key institutions  
5  
6 involved in policymaking; and secondary data from systematic review of government policy  
7  
8 documents, national surveys, donor reports and published research relating to MND.  
9  
10  
11

12 Primary data collection was carried out in Dakar, Senegal. High-level representatives  
13 involved in policymaking and implementation of policies concerning nutrition and health in  
14  
15 Senegal were eligible for inclusion in this study. In order to gauge the widest possible range of  
16  
17 stakeholder perspectives, maximum-variation sampling was applied to recruitment. This  
18  
19 included perspectives from within and outside national government, with participants from  
20  
21 government and non-government organizations (multilateral organizations, bilateral  
22  
23 organization, academic institutions working in the area on MND and health). (Table 1)  
24  
25  
26  
27  
28

29 Potential participants were identified through a number of different sources: 1) literature  
30 relating to micronutrients and health to identify the range of key institutions, 2) input from key  
31  
32 opinion leaders working in nutrition and health in Senegal to identify individuals from these  
33  
34 institutions 3) and snowball sampling, whereby participants were asked whether they could  
35  
36 recommend others who may be relevant to the study. Fifteen key institutions were identified and  
37  
38 potential participants representing these institutions were approached in person or by email  
39  
40 and/or telephone in order to set up interviews. Letters of introduction were then emailed  
41  
42 informing participants of the purpose of this study and seeking their consent to participate. All  
43  
44 fifteen individuals approached agreed to be interviewed for the study. Although the participants  
45  
46 purposely represent a diverse range of organizations, they share common interests and  
47  
48 knowledge in nutrition and health; they were also high-ranking representatives holding  
49  
50 leadership positions in their organizations.  
51  
52  
53  
54  
55  
56  
57  
58  
59  
60



1  
2  
3  
4  
5  
6  
7  
8  
9  
10  
11  
12  
13  
14  
15  
16  
17  
18  
19  
20  
21  
22  
23  
24  
25  
26  
27  
28  
29  
30  
31  
32  
33  
34  
35  
36  
37  
38  
39  
40  
41  
42  
43  
44  
45  
46  
47  
48  
49  
50  
51  
52  
53  
54  
55  
56  
57  
58  
59  
60

Semi-structured interviews were conducted in the capital Dakar at the offices of the participants (except for one interview conducted in the United States by telephone) in the summer of 2010. Informed consent was obtained verbally at the start of the interview. These interviews were guided by a prepared survey instrument developed exclusively for this study, although key experts were encouraged to discuss the issues pertaining to MNDs from their perspectives. The survey included one question designed to gauge the perceived level of political priority for MNDs using a Likert scale. Interviews lasted around one to two hours. When possible and permitted interviews were recorded, otherwise contemporaneous notes were taken which were then immediately written up following the interview. Interviews were primarily carried out in English, although in some interviews a mixture of English and French was used.

Each of the recorded interviews was transcribed. The interview transcripts and notes were examined and content analysis performed from which themes relevant to the research question identified. These were coded, applying an emic coding approach, based on methodology based on grounded theory.[18] In order to verify the themes that arose, sections of interview transcripts were also reviewed by other researchers during the data analysis stage to confirm the reliability of the coding and emergent themes during this inductive process.

These data was then entered into a spreadsheet, where the themes from internal stakeholders (from within the national government institutions) and external stakeholders (from outside national government) were grouped separately. This spreadsheet facilitated further analysis and identification of the perceived factors that facilitated or obstructed political priority for micronutrients.

1  
2  
3 This study was approved by the Institutional Review Board of Harvard School of Public  
4  
5 Health.  
6  
7  
8  
9

## 10 RESULTS

11  
12 The perceived level of political priority for MND on the national health agenda varied  
13 between participants, both within and outside national government. When asked to estimate the  
14 current level of priority (very low/low/medium/high/very high), the level of priority for internal  
15 stakeholders ranged from “very low” to “high,” and for external stakeholders ranged from “low”  
16 to “high.” Internal stakeholders were more likely to rank the level of priority afforded to MND  
17 as “medium” compared to “high” from external stakeholders. Participants from institutions  
18 whose mission was primarily related to nutrition and MND were more likely to perceive that  
19 MND occupied a lower level of priority on the national development agenda.  
20  
21  
22  
23  
24  
25  
26  
27  
28  
29  
30

31 Several themes emerged from the data analysis, revealing the factors affecting the level  
32 of national priority afforded to MND, and factors that affecting the implementation of MND  
33 policies. These were classified into facilitating and impeding factors, and ranked according to the  
34 frequency with which these were discussed. Facilitating factors were those that promote the  
35 creation and/or maintenance of political priority for MNDs, whereas impeding factors were those  
36 that curtailed development of political priority for MNDs. These factors are summarized in  
37 **Table 2**, and detailed below.  
38  
39  
40  
41  
42  
43  
44  
45  
46  
47  
48  
49  
50

### 51 *Factors facilitating agenda setting for micronutrient deficiencies:*

52 **Multiple stakeholders to collectively advocate for the issue**  
53  
54  
55  
56  
57  
58  
59  
60

1  
2  
3  
4  
5  
6  
7  
8  
9  
10  
11  
12  
13  
14  
15  
16  
17  
18  
19  
20  
21  
22  
23  
24  
25  
26  
27  
28  
29  
30  
31  
32  
33  
34  
35  
36  
37  
38  
39  
40  
41  
42  
43  
44  
45  
46  
47  
48  
49  
50  
51  
52  
53  
54  
55  
56  
57  
58  
59  
60

As in many low and middle-income countries, a large network of stakeholders work in nutrition in Senegal. All participants discussed the complexity of the partnerships between stakeholders working in MND and the necessary coordination required to achieve results in this sector. This required close coordination between the various divisions in the lead ministry (Ministère de la Santé, de la Prévention et de l'Hygiène Publique, MOH), between the MOH and external stakeholders, and between external stakeholders. The benefits of multiple stakeholders working towards the same goals were highlighted, both in collectively generating attention for the issue, capitalizing on their comparative strengths and technical capabilities to champion the issue with national policymakers.

For example, one external institution saw advocacy for MND as critical, stating this as part of their mission to increase priority for micronutrients: *“the key is to raise awareness and build capacity in the ministry, and to help provide the resources to integrate this [MND] into day to day delivery...by working with other partners we can drive the government to deliver.”*

The technical expertise and practical assistance from external stakeholders provided great support for this issue both at the policy and implementation level. Both internal and external stakeholders commented on the benefits of working together. The close community of technical experts allowed for sharing of knowledge and best practices, and these stakeholders were therefore able to come together to generate a more focused and combined approach to advocate for MND to have higher priority of the government agenda.

### **Availability of MND indicators to raise awareness and quantify issue severity**

Universally participants raised the importance of credible indicators in measuring MND severity and in evaluating and quantifying the impact of programmatic interventions. The

1  
2  
3 Senegal Demographic and Health Survey (DHS), a nationally representative survey which has  
4  
5 specific indicators relating to MND, was frequently referred to, which may have also reflected  
6  
7 the fact that the MOH and other stakeholders were actively preparing for implementation of the  
8  
9 next survey.  
10  
11

12 The availability of data was also seen as important to raising awareness of and advocating  
13 for the issue of MND. For example, one external stakeholder explained: *“Senegal, is trying to*  
14 *move forward in its development. They [MOH] are trying to look more at the indicators, for*  
15 *example malnutrition is high, and so therefore they want to change this... Therefore there is high*  
16 *priority of nutrition in the country...”* The timeliness of such data was also important, as one  
17  
18 internal stakeholder mentioned: *“fresh country results are important.”* Other internal and  
19  
20 external stakeholders discussed the challenges facing the delivery of timely, complete and  
21  
22 accurate data from the local level to the ministry and other stakeholders. Participants commonly  
23  
24 referred to indicators relating to anemia (iron deficiency is a major cause of anemia) and Vitamin  
25  
26 A, only rarely did they directly comment on iodine and zinc, and none commented directly on  
27  
28 folic acid deficiency.  
29  
30  
31  
32  
33  
34  
35  
36  
37  
38

39 Compared to interest with the Millennium Development Goals (MDG) indicators, interest  
40 in MND indicators by policymakers was seen as lacking. As another participant commented:  
41  
42 *“MDG indicators are on high-level documents and it helps to get financing for these activities*  
43 *and it also helps the government to be aware of nutrition. It was a very good idea [laughs]. But*  
44 *for micronutrients it is lacking, maybe we could improve this... We could have indicators*  
45 *involving micronutrients.”*  
46  
47  
48  
49  
50  
51  
52  
53  
54

## 55 **Transnational advocacy activities around MNDs**

56  
57  
58  
59  
60

1  
2  
3  
4 On the whole participants felt that global policy agendas and policy documents, such as  
5 the Millennium Development Goals, ‘*United Call to Action on Vitamin and Mineral*  
6 *Deficiencies*’ or ‘*Repositioning Nutrition as Central to Development*’ [19], did influence the  
7  
8 Senegalese national health policy agenda as it relates to nutrition and MND. The main  
9  
10 mechanism for this was thought to be through financial and technical resources driven by  
11  
12 external stakeholders.  
13  
14  
15  
16

17  
18 Commitments to achieve the MDGs helped to align different stakeholders working in  
19  
20 health as to the importance of nutrition in achieving these goals, which has also had a positive  
21  
22 impact on addressing micronutrient deficiencies as well. One internal participant said “*Nutrition*  
23 *has a role to play in all the [Millennium Development] Goals. It is very important. I think at the*  
24 *beginning [of the MDG process] the role of nutrition was not that clear, but now things are*  
25 *different...For women and children, it is very very very important to achieve the MDGs.*”  
26  
27 Transnational global health activities have helped with the advocacy for the role of nutrition; one  
28  
29 participant expressed this saying, “*For MND and nutrition globally, we use The Lancet to talk*  
30 *with the authorities. We use the global action plan for nutrition. It is a good way, if we use what*  
31 *is going on at the international level in our countries, all those results and all those information*  
32 *as advocacy materials to get political will.*” Another stated that “*with the global agenda, there is*  
33 *evaluation and therefore things are improving,*” indicating the transnational influence of  
34  
35 monitoring and evaluation and achieving targets.  
36  
37  
38  
39  
40  
41  
42  
43  
44  
45  
46  
47

48  
49 Senegal signed up to the Call to Action on vitamin and micronutrient deficiencies in  
50  
51 January 2010. Support for this came from the highest level within the lead ministry with the  
52  
53 Minister of Health and Prevention in Senegal joining with other key stakeholders to launch the  
54  
55 report, “*Investing in Senegal's Future: A United Call to Action on Vitamin and Mineral*  
56  
57  
58  
59  
60

1  
2  
3 Deficiencies.” This report specifically calls for increased commitment to MND, together with the  
4 investment in sustainable partnerships between stakeholders. [11] Although none of the internal  
5 stakeholders thought that this had impact on behavior, the impact perceived by external  
6 stakeholders was mixed. For example, one external stakeholder commented, “*I think that this*  
7 *[Call to Action] had impact. It reinforced for all stakeholders the importance of micronutrients.*  
8 *There was a real impact and the advantage is that this is the way to advance the agenda and to*  
9 *emphasize the importance.*” Other external stakeholders thought that the impact was minimal or  
10 hard to gauge. Although the severity of MND gained the attention of policymakers at the time of  
11 the launch, translating this into successful implementation was the main barrier identified by  
12 external stakeholders, especially those involved with implementation.  
13  
14  
15  
16  
17  
18  
19  
20  
21  
22  
23  
24  
25  
26  
27  
28

### **Factors impeding agenda setting for micronutrient deficiencies:**

29  
30  
31 From stakeholder interviews, five key factors were identified that seemed to hinder generation of  
32 political priority for MNDs; these are summarized below.  
33  
34  
35

#### **Issue invisibility: lack of awareness among policymakers and civil society**

36  
37  
38 Stakeholders commented on the particular challenge relating to issue visibility and the  
39 “hiddenness” of MND. This extended from policymakers to civil society. As one external  
40 stakeholder asked, “*Are all the stakeholders aware of the importance of micronutrients? For*  
41 *health? Economic growth? Regarding the well-being of the nation?. It is a question of*  
42 *awareness and political will, and maybe a question of difference sectors working all together.*”  
43  
44  
45  
46  
47  
48  
49

50 Similarly, another external stakeholder commented, “*At the policy level, it is a matter of*  
51 *awareness, information, and education on the issue;*” while another stated that “*At the ministry,*  
52 *there is no decision maker who asks for micronutrient indicators, say compared to*  
53  
54  
55  
56  
57  
58  
59  
60

1  
2  
3 *immunizations etc.*” This was contrasted to other global health issues such as maternal mortality  
4 and HIV/AIDS where the disease burden and impact were more “visible.”  
5  
6  
7

8 Universally stakeholders interviewed agreed that there is a lack of public awareness about  
9 nutrition and micronutrients, stating that there has been little attempt to mobilize civil society to  
10 press for progress in this issue. Some marketing campaigns are in place and were mentioned,  
11 such as fortified foods for infants, and national alliances to promote food fortification, but their  
12 impact is not known. This in part reflects the insidious nature of the symptoms and signs of  
13 MND. As one internal participant noted, *“If you have micronutrient deficiencies you can’t see it.*  
14 *Say you have anemia – when you go to the health system you are given medicine but you can’t*  
15 *see it - You can have anemia all your life and not know it. The consequences are not visible most*  
16 *of the time.”* Participants discussed the need to encourage public awareness to the public: for  
17 example, *“the beneficiaries[civil society] also need to see this and the benefits of results ... you*  
18 *know for comparison, for roads or for the wheels for water, they see it – they know it – you see*  
19 *that you need it for everything - they see the health huts and health centers and see that. But for*  
20 *micronutrients – you don’t see it.”* Thus for MND, the characteristics of the issue and the  
21 “hidden” presentation has implications for its visibility at the policy level and for civil society.  
22  
23  
24  
25  
26  
27  
28  
29  
30  
31  
32  
33  
34  
35  
36  
37  
38  
39  
40  
41  
42  
43

#### 44 **Issue complexity: multisectoral solutions required to address MNDs**

45  
46 Another challenge participants identified is the multisectoral nature of the necessary  
47 interventions to deal with MND. This spans ministries and although there is a specific taskforce  
48 on addressing malnutrition in Senegal, coordinating a response is difficult. Furthermore, there  
49 were inconsistencies in the perceptions of who should take leadership and responsibility for this  
50 issue, and what the policy solutions should be. One internal stakeholder expressed the opinion  
51  
52  
53  
54  
55  
56  
57  
58  
59  
60

1  
2  
3 that the MOH should not be the main overseer of nutrition, as prevention (rather than treatment)  
4 should be championed and therefore it should fall most under the remit of the Ministries of  
5  
6  
7  
8 Agriculture, Industry and Education. He indicated *“It is a multisectoral issue, maybe health is*  
9  
10 *doing its role, but there are other sectors that may not be doing so. I think that in Senegal we*  
11 *need a better approach. We have not yet defined what it should be... There are different sectors*  
12 *with different responsibilities, and we need to do this exercise to define the issue and then the*  
13 *level of priority. For example, with anemia, you have to work on the agriculture, industry – they*  
14 *all have responsibilities and roles – many other sectors - as the MOH is there to see the*  
15 *problems – it just works on the end.”* Another participant commented on collaboration between  
16  
17 internal and external sectors, saying *“We have to join efforts between the MOH and industry*  
18 *and the private sector – health alone won’t be able to reduce this significantly. The MOH works*  
19 *on the consequences of MND, they are at the end, and it’s a big deal for the MOH.”*

20  
21  
22  
23  
24  
25  
26  
27  
28  
29  
30  
31  
32  
33  
34  
35  
36  
37  
38  
39  
40  
41  
42  
43  
44  
45  
46  
47  
48  
49  
50  
51  
52  
53  
54  
55  
56  
57  
58  
59  
60

These views reflect the difficulties that extend from the multisectoral nature of the issue in terms of coordinating the complex array of actors working in nutrition and health, and who should take responsibility for overseeing this issue, both in terms of prevention versus treatment and public versus private sector involvement. This is further complicated by the different agendas and priorities that these external partners may have. As one internal stakeholder commented, *“sometimes you face difficulties as they have different agendas, so you have to a good sense of flexibility and adaptability as an organization.”* Operationally, coordination means that much time is spent in meetings and significant ministerial capacity is reportedly spent *“in meetings and doing report preparation, rather than the actual work.”* One external stakeholder commented, *“If you go to into X [referring to a MOH Division], no-one else is there as they are all out with different partners. It is very difficult to manage.”* All external



1  
2  
3 stakeholders interviewed however were sympathetic to the limitations of the ministerial capacity  
4  
5 to deal with competing priorities and the burden of work, given the limited human and  
6  
7 operational resources.  
8  
9

### 10 11 12 13 **Lack of adequate resources to support MND: trapped in a ‘low priority’ cycle** 14

15  
16 Lack of financial, human and physical resources to support MND initiatives and their  
17  
18 scaling up were stated as a major challenge to actually realizing higher political priority for  
19  
20 MND. Both internal and external stakeholders commented on lack of resources compounding  
21  
22 the difficulty of integrating MND policy solutions into the day to day delivery of existing  
23  
24 programs, which meant that the issue was stuck as a low priority issue,[20] with lack of  
25  
26 budgetary commitment to support advocacy efforts for higher prioritization of the issue.  
27  
28

29  
30 The interviews with the internal stakeholders revealed four challenges: firstly, the  
31  
32 inadequate financial commitments to MND from the government, which made the MOH very  
33  
34 dependent on external partners to support this agenda. Although necessary, this, in their opinion,  
35  
36 had limited the ability to develop and implement a longer term vision for MND. Secondly,  
37  
38 [that] “*the resources are not sufficient to implement the programs, [and thirdly,] the other is the*  
39  
40 *coordination of existing resources. We need to use these efficiently, with better coordination of*  
41  
42 *the existing resources. We have to do better, and put in enough effort to use resources*  
43  
44 *rationally...It is really important to coordinate better – interventions and resources”*. Fourthly,  
45  
46 financing vertical programs reportedly compromised a more holistic approach to tackle MND,  
47  
48 and also limited the flexibility for resource allocation.  
49  
50  
51  
52  
53  
54  
55  
56  
57  
58  
59  
60

1  
2  
3 More positively, new global funds earmarked for nutrition, and the collective support of  
4 the external stakeholders meant that gaps in service delivery where possible could be addressed  
5 by different partners working together.  
6  
7  
8  
9

### 10 11 12 **Lack of a champion to advocate for the issue and institutional weakness of the lead** 13 **ministry** 14

15  
16  
17 A specific issue raised was the lack of an individual or champion to “push” for MNDs  
18 from within the ministry. Buildings on the preceding theme, lack of resources were felt to further  
19 compound the effectiveness of the lead institution. Six out of the eight external stakeholders  
20 identified poor leadership from the MOH as an obstructing factor facing priority setting for  
21 MND and the development and implementation of related policy solutions, whereas only two of  
22 seven internal stakeholders raised this issue. Furthermore, stakeholders commented on the lack  
23 of a clear strategic plan for MND, with limited leadership capacity to manage the necessary  
24 multisectoral response and coordinate multiple stakeholder involvement for MND. One external  
25 stakeholder commented: “*This [MND] requires a high level of leadership from the ministry ....*  
26 *there is a certain level of leadership, but this needs to be developed more to bring all available*  
27 *resources to implement the interventions priority, by priority, which should be defined by the*  
28 *MOH. This is really important...*” Similarly, another external stakeholder stated, “*It is a*  
29 *question of leadership. They [MOH] need to have a very strategic plan, it is very important,*  
30 *because with the implementation plan, and with monitoring and evaluation, it is important for*  
31 *the MOH to coordinate all the support. It is not easy [laughs] ...it is a challenge.*”  
32  
33  
34  
35  
36  
37  
38  
39  
40  
41  
42  
43  
44  
45  
46  
47  
48  
49  
50  
51  
52  
53  
54  
55  
56  
57  
58  
59  
60

1  
2  
3 The internal stakeholders who specifically commented on leadership from the lead  
4 institution did however state how they are attempting to address this issue and build up the  
5 ministerial leadership capacity through various training initiatives.  
6  
7  
8  
9

### 10 11 12 **Challenge of demonstrating effectiveness of interventions for MND to reinforce advocacy** 13 **efforts** 14

15  
16  
17 Despite the theoretical existence of effective interventions for MND, implementation was  
18 identified by participants as a key challenge in the Senegalese context. The need to show the  
19 effectiveness of interventions was critical, yet difficulties with data and information systems  
20 hindered pursuit of this. As an internal stakeholder pointed out, *“We have many problems with*  
21 *data. Data is very important to identify better interventions and to allocate resources...we have*  
22 *some problems, especially at the health facilities level to monitor here – there are sometimes*  
23 *lack of materials to collect such data, and I know the ministry is trying to improve this fact. If we*  
24 *lack data, we will always have problems. This is important for monitoring key indicators, and*  
25 *necessary for operations... All partners are interested in this.”* The problems with data  
26 collection identified by interviewees included, the lack of supervision at the community level for  
27 collecting data, poor reporting resulting from limited training, capacity, lack of job awareness  
28 and lack of transfer of data centrally leading in information and data loss.  
29  
30  
31  
32  
33  
34  
35  
36  
37  
38  
39  
40  
41  
42  
43  
44

45 Stakeholders reiterated the importance of demonstrating success to strengthen advocacy:  
46 *“For advocacy you need results. The best way to advocate is to show results and that it works.*  
47 *At the moment we don’t have the evidence to show this... it is very difficult.”* The pressure to  
48 gather data for monitoring and evaluation to show the effectiveness of their interventions was  
49 highlighted by external stakeholders working on the implementation side. Evaluating the impact  
50  
51  
52  
53  
54  
55  
56  
57  
58  
59  
60

1  
2  
3 of programs was seen as important for securing continued donor support. *“Results can help the*  
4 *process to improve. With results, then they [partners and donors] will come. Each donor or*  
5 *partner wants results. With results, then they will come. It’s not complicated,”* an internal  
6 stakeholder explained.  
7  
8  
9  
10  
11

## 12 13 14 15 **DISCUSSION**

16  
17 This qualitative study identified several factors affecting the political prioritization  
18 process for micronutrient deficiencies from the perspective of key experts working in this field.  
19 In doing so, it offers some explanation as to why the issue of MND has struggled to gain political  
20 attention and make it onto the policy agenda. Interestingly, this study also identified that the  
21 perceived level of political priority for MND varied considerably between key stakeholders  
22 involved in the field of nutrition and health in Senegal. This may reflect the perceptions of the  
23 individuals representing these organizations, or may be the result of, or consequence of, how the  
24 issue of MND is understood and framed by the national policy community. This qualitative  
25 analysis therefore raises questions into the complex relationship between perceptions of political  
26 priority and the agenda setting process for MND.  
27  
28  
29  
30  
31  
32  
33  
34  
35  
36  
37  
38  
39

40  
41 Relating the study’s findings to the existing theoretical literature yields some additional  
42 insights. Kingdon’s theory of agenda-setting argues that for an issue to gain political priority on  
43 the government agenda, three independent streams need to converge: the problem stream, where  
44 an issue becomes perceived as a problem that needs to be and can be addressed compared to  
45 other competing priorities; the policy stream, where a set of alternative policy solutions are  
46 proposed to address the problem; and the politics stream, where political events create a window  
47 of opportunity for policy reform.[9]  
48  
49  
50  
51  
52  
53  
54  
55  
56  
57  
58  
59  
60

1  
2  
3  
4 In this case, in the problem stream, we see that credible indicators that objectively  
5  
6 quantified the severity of the issue were used by the policy community to highlight the  
7  
8 prevalence of MNDs. However, several factors impeded the progress – these mainly relate to the  
9  
10 characteristics of the problem or issue itself. First, the clinical presentation and “hiddenness” of  
11  
12 MND has diminished the visibility of this issue and poses a challenge to it commanding the  
13  
14 attention of civil society and policymakers. This is in contrast, for example, to HIV/AIDS  
15  
16 where the impact on people, societies and economies are highly visible, and facilitated  
17  
18 generating attention and support for the issue.[21] Second, the chronic nature of MND which  
19  
20 does not command a sense of urgency to act, for example compared to acute epidemics. Third,  
21  
22 although global evidence to support effective interventions were available, the lack of country-  
23  
24 level evidence and inability to demonstrate clear results from policy and programmatic actions  
25  
26 impeded advocacy efforts to address the issue. Policymakers, in order to get behind the issue  
27  
28 need to be convinced of its feasibility, with investment in political capital bringing about positive  
29  
30 results rather than taking the risk of backing more complex or challenging issues.  
31  
32  
33  
34  
35

36 In the policy stream, we see that the policy community, although diverse, was cohesive.  
37  
38 All stakeholders commented on the collective efforts in advocating for MNDs, and how this  
39  
40 strengthened their ability, harnessing their individual strengths, to champion the issue. It was  
41  
42 also opportune to champion all MNDs together as one group, rather than individual deficiencies.  
43  
44 However, two impeding factors were identified. First, the institutional weakness of the lead  
45  
46 ministry, which lacked resources and capacity to take on this issue; and, second, the complexity  
47  
48 of the policy solutions required to address MNDs. Stakeholders were agreement that a  
49  
50 multisectoral response was required, with the need for multi-stakeholder involvement to address  
51  
52 different micronutrient deficiencies; this added another layer of complexity, both technically and  
53  
54  
55  
56  
57  
58  
59  
60

1  
2  
3 operationally, to delivering an effective response. In the Senegalese setting, there were  
4  
5 difficulties in ensuring the timeliness, accuracy and completeness of data to demonstrate the  
6  
7 effectiveness of policy responses. This was compounded by the limited leadership capacity of the  
8  
9 lead ministry to coordinate stakeholders and activities, to maximize the potential of such  
10  
11 partnerships and to bring other ministries to the table to tackle the issue.  
12  
13

14  
15 In the politics stream, no clear political transitions were discussed by stakeholders that  
16  
17 could present a window of opportunity for reform. Nor was there evidence of a policy advocate,  
18  
19 a person who was actively championing the issue of MNDs, or of civil society organizations  
20  
21 pushing for this problem to be addressed. The concentration of MNDs among vulnerable groups  
22  
23 of women and children is critical: these groups are less politically empowered and have limited  
24  
25 electoral power to command priority from policymakers. Furthermore, as many of those afflicted  
26  
27 by MNDs are unaware of the disease burden, it is even more challenging to mobilize interest  
28  
29 groups around this issue.  
30  
31  
32

33  
34 The importance of global agenda-setting activities at the national level was a key theme  
35  
36 raised by this analysis. While such global advocacy is not included in Kingdon's model, which  
37  
38 focuses on national agenda setting, this factor has been raised in the applied literature examining  
39  
40 the priority of global health issues on national agendas. Shiffman highlighted the importance of  
41  
42 'transnational influences' whereby norm promotion and resource provision can influence the  
43  
44 degree to which an issue appears on the national agenda.[10]  
45  
46  
47

48 In the case of MNDs in Senegal, several themes around global influences were  
49  
50 highlighted. First, was the use of internationally-recognized evidence base on effective solutions  
51  
52 for MND, (for example, Lancet series on nutrition) which resonated well with the policy  
53  
54 community, giving them cogent arguments to support their advocacy effort with decision  
55  
56  
57  
58  
59  
60

1  
2  
3 makers. Second, was the impact of donor funding on influencing national priorities. Although,  
4  
5 some stakeholders criticized the lead ministry for not taking command, stakeholders also  
6  
7 commented on the role of external donors which influence the agenda through their own  
8  
9 priorities and resource allocation. Donor agendas were purported to undermine the  
10  
11 empowerment of the ministry to take charge of deciding which competing priorities should  
12  
13 receive funding allocation. Third, was the influence of global advocacy for MND: the local  
14  
15 launch of the *Call to Action on Vitamin and Mineral Deficiencies* provided a forum to garner  
16  
17 support and galvanize how the issue was framed both among the policy community and to  
18  
19 broader audiences. While the issue of MND gained the attention of policymakers at the time of  
20  
21 the launch, the challenge remained translating this into sustained political prioritization for  
22  
23 MNDs.  
24  
25  
26  
27  
28

29 This qualitative study has limitations. As with all case studies, it is not possible to  
30  
31 generalize these findings to other settings and contexts. However, it is likely that many of the  
32  
33 themes raised, such as the issue characteristics and issue complexity of MNDs; and processes,  
34  
35 such as multisectoral coordination and advocacy through a policy champion are likely to be  
36  
37 relevant to other settings. Second, are issues relating to study methodology. Not all interviews  
38  
39 were recorded which may have limited the ability to delineate nuances available from transcribed  
40  
41 interviews. Also, due to operating in two languages at times, some subtle understanding of  
42  
43 issues may not have been clearly denunciated, especially as many of the participants were not  
44  
45 using their native language. Although stakeholders interviewed for this study represent the array  
46  
47 of institutions working in micronutrients, it may be possible that other representatives from these  
48  
49 same institutions or other institutions or sectors could have added further insights to the study's  
50  
51 findings. Third, my positionality having being introduced with a letter of introduction from the  
52  
53  
54  
55  
56  
57  
58  
59  
60

1  
2  
3 lead ministry may have affected how participants responded to me, as well as my status as an  
4  
5 outsider. Also, my personal connection with different participants may have differentially  
6  
7 altered their responses; for example, those who were also physicians, or those who were also  
8  
9 pursuing/had pursued Ph.Ds., were more open with me because of this shared bond.  
10  
11

12  
13 Notwithstanding these limitations, this analysis does offer some insight into how national  
14  
15 agenda setting for this important global health issue is influenced by global advocacy efforts. In  
16  
17 moving forward, it is important to be aware of the factors affecting agenda setting to devise  
18  
19 political strategies to help prioritize neglected development issues, such as MNDs, at both  
20  
21 national and global levels. Some recommendations include building on the existing facilitating  
22  
23 factors, while minimizing or negating the impeding factors that were identified in this study:  
24  
25

- 26  
27 1) Identify and support a champion to strongly advocate for micronutrient deficiencies, and take  
28  
29 advantage of focusing events both nationally and globally that could promote the issue  
30  
31
- 32  
33 2) Promote greater attention to micronutrient deficiencies among civil society, for example  
34  
35 through education activities or through mass media and social media, so civil society are  
36  
37 more aware of the issue and its consequences  
38  
39
- 40  
41 3) Support the already cohesive policy community to work together to devise strategies that best  
42  
43 capitalise on their collective strength and doing so push national political officials to commit.  
44  
45
- 46  
47 4) Focus on carefully monitoring and evaluating MND policies and programmes, and  
48  
49 documenting successes so as to demonstrate effective and feasible policy solutions to  
50  
51 demonstrate to policymakers.  
52

53  
54 Many stakeholders interviewed were not acutely cognizant of political process relating to  
55  
56 agenda setting for health policy, and were interested in this research question and the potential  
57  
58 implications of this research. To this end, it is also important for the policy and technical  
59  
60



1  
2  
3 community to be aware of the politics around the policy process and build capacity to navigate  
4 the political process.[22] This should take advantage of the existing methods and tools that  
5 already exist to conduct a political analysis for food and nutrition security,[23] and generate  
6 recommendations to support the political process to help champion MNDs and well as under-  
7 prioritized conditions requiring the attention and action of policymakers.  
8  
9  
10  
11  
12  
13  
14  
15  
16  
17  
18  
19  
20  
21  
22  
23  
24  
25  
26  
27  
28  
29  
30  
31  
32  
33  
34  
35  
36  
37  
38  
39  
40  
41  
42  
43  
44  
45  
46  
47  
48  
49  
50  
51  
52  
53  
54  
55  
56  
57  
58  
59  
60

For peer review only

**Table 1: Characteristics of study participants interviewed for this study**

| <b>Stakeholder</b>                            | <b>Organization</b>            | <b>n</b>  |
|-----------------------------------------------|--------------------------------|-----------|
| Internal stakeholders<br>(within government)  | Governmental institutions      | <b>7</b>  |
|                                               | National executive agency      | <b>1</b>  |
| External stakeholders<br>(outside government) | Multilateral institutions      | <b>3</b>  |
|                                               | Bilateral institutions         | <b>1</b>  |
|                                               | Non-governmental organizations | <b>2</b>  |
|                                               | Academia/clinical medicine     | <b>1</b>  |
| <b>Total</b>                                  |                                | <b>15</b> |

**Table 2: Identified factors affecting agenda setting for micronutrient deficiencies (MNDs)**

| <b>Factors facilitating agenda-setting for MNDs</b>                           | <b>Factors impeding agenda-setting for MNDs</b>                                                |
|-------------------------------------------------------------------------------|------------------------------------------------------------------------------------------------|
| Multiple stakeholders to collectively advocate for the issue                  | Issue invisibility: lack of awareness among policymakers and civil society.                    |
| Availability of MND indicators to raise awareness and quantify issue severity | Issue complexity: multisectoral solutions required to address MNDs.                            |
| Transnational advocacy activities around MND                                  | Lack of adequate resources to address MND: trapped in a 'low priority' cycle.                  |
|                                                                               | Lack of a champion to advocate for the issue and institutional weakness of the lead ministry   |
|                                                                               | Challenge of demonstrating effectiveness of interventions for MND to support advocacy efforts. |

## REFERENCES

1. UNICEF (2013) Improving child nutrition: The achievable imperative for global progress. New York, NY, USA: UNICEF: 18.
2. Micronutrient Initiative (2009) Investing in the future: A united call to action on vitamin and mineral deficiencies Ottawa: Micronutrient Initiative.
3. Ezzati M, Lopez AD, Rodgers AA, Murray CJL (2004) Comparative quantification of health risks : global and regional burden of disease attributable to selected major risk factors. Geneva: World Health Organization. 2 v. (2248 p.)+ v.2243 in 2241CD-ROM . p.
4. Murray CJ, Vos T, Lozano R, Naghavi M, Flaxman AD, et al. (2012) Disability-adjusted life years (DALYs) for 291 diseases and injuries in 21 regions, 1990-2010: a systematic analysis for the Global Burden of Disease Study 2010. *Lancet* 380: 2197-2223.
5. Boy E, Mannar V, Pandav C, De Benoist B, Viteri F, et al. (2009) Achievements, challenges, and promising new approaches in vitamin and mineral deficiency control. *Nutrition Reviews* 67: S24-S30.
6. Consensus C (2012) Expert panel findings. Copenhagen Consensus 2012. . Washington, DC: Copenhagen Consensus Center, .
7. Walt G, Shiffman J, Schneider H, Murray S, Brugha R, et al. (2008) 'Doing'health policy analysis: methodological and conceptual reflections and challenges. *Health Policy and Planning* 23: 308.
8. Shiffman J, Smith S (2007) Generation of political priority for global health initiatives: a framework and case study of maternal mortality. *The Lancet* 370: 1370-1379.
9. Kingdon J (2002) *Agendas, Alternatives, and Public Policies* (Longman Classics Edition): Longman Publishing Group.
10. Shiffman J (2007) Generating political priority for maternal mortality reduction in 5 developing countries. *American journal of public health* 97: 796-803.
11. Shiffman J (2010) Issue attention in global health: the case of newborn survival. *Lancet* 375: 2045-2049.
12. Geneau R, Stuckler D, Stachenko S, McKee M, Ebrahim S, et al. (2010) Raising the priority of preventing chronic diseases: a political process. *The Lancet* 376: 1689-1698.
13. Shiffman J (2003) Generating political will for safe motherhood in Indonesia. *Social Science & Medicine* 56: 1197-1207.
14. Hafner T, Shiffman J (2013) The emergence of global attention to health systems strengthening. *Health policy and planning* 28: 41-50.
15. Shiffman J, Quissell K (2012) Family planning: a political issue. *Lancet* 380: 181-185.
16. Micronutrient Initiative (January 19, 2010) Investing in Senegal's Future: A United Call To Action On Vitamin And Mineral Deficiencies.
17. George, A. L., & Bennett, A. (2005) *Case studies and theory development in the social sciences*: Mit Press. Cambridge, Massachusetts.
18. Glaser BG, Strauss AL (2009) *The discovery of grounded theory: Strategies for qualitative research*: Transaction Books.
19. Shekar M, Heaver R, Lee Y-K (2005) *Repositioning Nutrition as Central to the Development Agenda: A Strategy for Large Scale Action*: World Bank-free PDF.
20. Natalicchio M (2009) *Carrots and sticks: the political economy of nutrition policy reforms*: World Bank.
21. Shiffman J (2006) HIV/AIDS and the rest of the global health agenda. *Bulletin of the World Health Organization* 84: 923-923.
22. Fox A, Reich M, editors (2013) *Political Economy of Reform: The Art of the Feasible*. Washington D.C>: World Bank Publications.
23. Reich MR, Balarajan Y (2012) *Political economy analysis for food and nutrition security*. HNP Discussion PaperWorld Bank and SAFANSI, Washington, DC.

## ACKNOWLEDGEMENTS

The author expresses thanks to the key experts who kindly participated in this study and the Council of Women World Leaders. In addition, the author would like to thank Vanessa Fong, Christina Smiraglia and classmates from the Harvard Graduate School of Education for verifying the data analysis and reviewing earlier drafts of this paper; as well as Donald Halstead for insightful comments.

## AUTHOR DISCLOSURES

- YB declares no conflicts of interest and no competing interests.
- The authors has completed the Unified Competing Interest form at [www.icmje.org/coi\\_disclosure.pdf](http://www.icmje.org/coi_disclosure.pdf) (available on request from the corresponding author) and declare that YB has no specified relationships with any companies that might have an interest in the submitted work in the previous 3 years; and YB has no non-financial interests that may be relevant to the submitted work.
- The Corresponding Author has the right to grant on behalf of all authors and does grant on behalf of all authors, a worldwide licence to the Publishers and its licensees in perpetuity, in all forms, formats and media (whether known now or created in the future), to i) publish, reproduce, distribute, display and store the Contribution, ii) translate the Contribution into other languages, create adaptations, reprints, include within collections and create summaries, extracts and/or, abstracts of the Contribution, iii) create any other derivative work(s) based on the Contribution, iv) to exploit all subsidiary rights in the Contribution, v) the inclusion of electronic links from the Contribution to third party material where-ever it may be located; and, vi) licence any third party to do any or all of the above.
- This study was approved by the Institutional Review Board of the Harvard School of Public Health. Protocol #: 19491-101. All participants gave informed consent before taking part.
- This study was not supported by a specific grant. The author was a recipient of a Fellowship from the Council of Women World Leaders, Washington D.C. The fellowship program had no role in the study design; in the collection, analysis, and interpretation of data; in the writing of the report; and in the decision to submit the article for publication.
- YB had full access to all of the data in the study and can take responsibility for the integrity of the data and the accuracy of the data analysis. Data sharing: no additional data available.
- YB affirms that the manuscript is an honest, accurate, and transparent account of the study being reported; that no important aspects of the study have been omitted; and that any discrepancies from the study as planned (and, if relevant, registered) have been explained.

# BMJ Open

## Creating political priority for micronutrient deficiencies: A qualitative case study from Senegal

|                                 |                                                                                                 |
|---------------------------------|-------------------------------------------------------------------------------------------------|
| Journal:                        | <i>BMJ Open</i>                                                                                 |
| Manuscript ID:                  | bmjopen-2014-004784.R1                                                                          |
| Article Type:                   | Research                                                                                        |
| Date Submitted by the Author:   | 26-Jun-2014                                                                                     |
| Complete List of Authors:       | Balarajan, Yarlini; Harvard School of Public Health, Department of Global Health and Population |
| <b>Primary Subject Heading</b>: | Global health                                                                                   |
| Secondary Subject Heading:      | Global health, Nutrition and metabolism, Qualitative research, Health policy                    |
| Keywords:                       | micronutrients, political priority, agenda setting, Nutrition < TROPICAL MEDICINE               |
|                                 |                                                                                                 |

SCHOLARONE™  
Manuscripts

Peer Review Only

1  
2  
3  
4  
5  
6 **Title:** Creating political priority for micronutrient deficiencies: A qualitative case study from  
7  
8 Senegal  
9

10  
11  
12  
13 **Author\*:** Yarlini Balarajan  
14

15  
16  
17 **Author's Affiliation:** Department of Global Health and Population, Harvard School of Public  
18 Health. Boston, MA, 02115. USA  
19  
20  
21  
22 ysb877@mail.harvard.edu  
23

24  
25 \*corresponding author  
26  
27

28  
29 **Running head:** political priority for micronutrient deficiencies  
30  
31  
32

33  
34 **Keywords:** micronutrients, political priority, agenda setting, policy process, nutrition,  
35  
36  
37  
38  
39  
40  
41  
42  
43  
44  
45  
46  
47  
48  
49  
50  
51  
52  
53  
54  
55  
56  
57  
58  
59  
60

## ABSTRACT

**Objectives:** To examine what factors influence the agenda-setting process for micronutrient deficiencies (MND) and the level of political priority afforded to MNDs.

**Design:** Qualitative case study employing process-tracing, informed by primary data collected from semi-structured interviews with policymakers.

**Setting:** Dakar, Senegal

**Results:** Several facilitating and impeding factors affecting the level of political prioritization for MNDs were identified. Facilitating factors included multiple stakeholders, each with their respective strengths and capabilities, using aligned framing to collectively advocate for MNDs; availability of indicators to quantify issue severity and raise awareness; and transnational advocacy activities around micronutrients. Impeding factors included lack of awareness among policymakers and civil society about MNDs; issue complexity, with the need for coordinated multisectoral response to deliver a complex package of solutions; lack of resources for competing issues trapping the issue in a 'low priority' cycle; lack of a policy champion to advocate for the issue; and the challenge of demonstrating the effectiveness of interventions to support advocacy efforts.

### Conclusions:

This study gives insight into the political prioritization process for micronutrient deficiencies from the perspective of key stakeholders working at the national level in Senegal. In doing so, the study offers some explanation as to why the issue of MNDs has struggled to gain political attention and make it onto the national policy agenda. Moving forward, greater awareness of the factors affecting agenda setting for MNDs may help to devise political strategies to champion this development issue in countries with high burdens of micronutrient deficiencies.



## ARTICLE SUMMARY

### Strengths and limitations of this study

- To the author's knowledge, this is the first exploratory study examining the political prioritization process for the micronutrient deficiencies.
- This study draws on primary data collected from key stakeholders involved in the policy process, and relates the study's findings to the existing theoretical literature to yield some additional insights.
- As with any qualitative case study, it is not possible to generalize the findings to other settings and contexts, although some findings relating to issue characteristics and issue complexity of micronutrient deficiencies may be transferable to other settings.
- The sample size was not large; however, maximum-variation sampling was applied to recruitment to ensure representation from all the key stakeholders from within and outside national government.

### What is already known

- Micronutrient deficiencies remain a major global health issue affecting women and children in several low and middle income countries (over 50 million disability-adjusted life years lost globally).
- No previous studies have systematically explored what factors influence the agenda-setting process for micronutrient deficiencies, nor the level of political priority afforded to this issue at the national level.

### **What this study adds**

- This study identifies several factors facilitating and impeding the level of political prioritization for micronutrient deficiencies at the national level. It offers some explanation as to why the issue of micronutrient deficiencies has struggled to gain political attention in Senegal.

Greater attention to the factors affecting agenda setting can be used to devise political strategies to help prioritize micronutrient deficiencies on national agendas

## INTRODUCTION

Vitamin and mineral deficiencies are a leading cause of ill-health, affecting vulnerable populations, especially children and women of reproductive age in low and middle-income countries.[1] Deficiencies of iodine, iron, folic acid, zinc and Vitamin A are sometimes collectively referred to by the term “hidden hunger”[2] – this term, in part, reflects the insidious clinical presentation of micronutrient deficiencies (MNDs). Only a small fraction of those affected by MNDs present with overt clinical signs and symptoms, with the majority having subclinical deficiencies. As a result, MNDs can go unnoticed by individuals suffering from them. Despite this “hiddenness,” MNDs are associated with adverse health and development consequences, contributing to maternal and child mortality and morbidity, physical and intellectual impairment, and loss of work productivity, attributing to over 50 million disability-adjusted life years (DALYs) lost globally.[3,4]

While low-cost, effective interventions to address MNDs exist, progress towards reducing the disease burden associated particularly with iron, folate and zinc deficiencies remains limited,[2] with mixed progress both within and between countries.[5] Yet, in terms of benefit: cost ratios, interventions to address MNDs are deemed the most favorable of all health and development interventions available to improve global welfare.[6] This raises the interesting and important question of why the issue of MNDs has not generated political priority among national policymakers despite the high disease burden and favorable policy solutions. To the author’s knowledge, no previous studies have examined this issue.

Therefore, this study set out to explore the factors determining the national political priority afforded to MNDs. Based on fieldwork conducted in Senegal, it explores how key experts working in nutrition and health perceive the level of political priority afforded to

1  
2  
3 micronutrients in the national health agenda in Senegal, and what factors they consider affect the  
4 process of agenda setting for this issue. In Senegal in 2010-11, an estimated 76% of children  
5 aged 6 to 59 months and 54% of women aged 15 to 49 years were anemic; and an estimated 47%  
6 of households consumed adequately iodized salt,[7] signaling that interventions to address  
7 micronutrient deficiencies are needed to reach vulnerable groups.  
8  
9  
10  
11  
12  
13

### 14 15 16 17 18 **Agenda setting for global health issues**

19  
20 *“It all depends on politics”*

21  
22  
23 – Study participant, Dakar, Senegal

24  
25 Health policy in low and middle-income countries operates in an increasingly complex  
26 environment where global and national actors interact across borders to shape policy and its  
27 implementation. The growing numbers of actors, increased connectivity and networks, and  
28 changing inter-organizational relationships are altering the policy process.[8] A key part of this  
29 policy process is agenda setting - the first stage of the policy cycle -which describes the factors  
30 that influence how issues are defined and prioritized on the policy agenda. Expectedly, there is  
31 variation of the priority and attention granted to different global health issues. However, it is not  
32 fully understood why and what factors drive this variation.[9]  
33  
34  
35  
36  
37  
38  
39  
40  
41  
42

43  
44 Political scientists and public policy scholars have examined the process by which issues  
45 are championed and receive political attention in the agenda-setting stage. Many of these have  
46 drawn on Kingdon’s theory of agenda setting, where the convergence of three different ‘streams’  
47 (problem, policy and politics) increase the likelihood of policy success.[10] More recently,  
48 Shiffman and Smith proposed a framework for determinants of political priority for global health  
49 initiatives.[9] Not theoretically driven, this framework identified 11 variables associated with  
50  
51  
52  
53  
54  
55  
56  
57  
58  
59  
60

1  
2  
3 increased likelihood that a given issue will be placed high on a policy agenda, related to ‘actor  
4 power’, ‘ideas’, ‘political context’ and ‘issue characteristics,’ drawing from factors inductively  
5 derived from study of the issue of maternal mortality across five countries.[11] This work has  
6 led to studies that have explored agenda-setting processes related to different global health  
7 issues, such as maternal health, newborn health, health systems strengthening and family  
8 planning.[9,12,13,14,15,16]  
9

10  
11 By increasing our understanding of the factors influencing agenda setting, it may be  
12 possible to identify opportunities to advance reform and affect the political policy process.  
13 Furthermore, by devising political strategies, there is potential to better advocate for hitherto  
14 neglected global health issues, such as MNDs. Thus, this knowledge may be one way of  
15 responding to the ‘Call to Action’ from the global health and nutrition community to develop and  
16 sustain priority for MNDs on the agenda of national governments.[5] In 2009, a ‘*United Call to*  
17 *Action on Vitamin and Mineral Deficiencies*’ was endorsed by multiple stakeholders working in  
18 the field, which set forth the case for investing in addressing MNDs and united global advocacy  
19 efforts. The global launch was followed by national launches in four countries, Bangladesh,  
20 Kenya, Pakistan and Senegal, in an attempt to increase commitment for MNDs and develop  
21 sustainable partnerships between national government and other stakeholders.[17] The case  
22 study of Senegal was selected for this study as this was one of the countries where a national  
23 launch of the global call to action was held, providing an opportunity to also explore how global  
24 agenda-setting processes influence the national policy process.  
25  
26  
27  
28  
29  
30  
31  
32  
33  
34  
35  
36  
37  
38  
39  
40  
41  
42  
43  
44  
45  
46  
47  
48  
49

## 50 **METHODS**

51  
52 This case study used process-tracing, a qualitative method used by political and social  
53 scientists, that can be applied to assess complex processes where multiple factors may interact to  
54  
55  
56  
57  
58  
59  
60

1  
2  
3 cause effects.[18] Process-tracing is appropriate for within-case analysis and particularly useful  
4  
5 for examining complex issues, such as the policy process; and understanding and exploring  
6  
7 historical events, such as the national launch of a global ‘Call to Action’ on micronutrient  
8  
9 deficiencies.  
10  
11

12  
13 Multiple data sources were triangulated to minimize systematic bias: primary data  
14  
15 collected from semi-structured interviews with high-level representatives from key institutions  
16  
17 involved in policymaking; and secondary data from systematic review of government policy  
18  
19 documents, national surveys, donor reports and published research relating to MNDs.  
20  
21

22  
23 Primary data collection was carried out in Dakar, Senegal. High-level representatives  
24  
25 involved in policymaking and implementation of policies concerning nutrition and health in  
26  
27 Senegal were eligible for inclusion in this study. In order to gauge the widest possible range of  
28  
29 stakeholder perspectives, maximum-variation sampling was applied to recruitment. This  
30  
31 included perspectives from within and outside national government, with participants from  
32  
33 government and non-government organizations (multilateral organizations, bilateral  
34  
35 organization, academic institutions working in the area on MNDs and health). (Table 1)  
36  
37  
38

39  
40 Potential participants were identified through a number of different sources: 1) literature  
41  
42 relating to micronutrients and health to identify the range of key institutions, 2) input from key  
43  
44 opinion leaders working in nutrition and health in Senegal to identify individuals from these  
45  
46 institutions 3) and snowball sampling, whereby participants were asked whether they could  
47  
48 recommend others who may be relevant to the study. Fifteen key institutions were initially  
49  
50 identified and potential participants representing these institutions were approached in person or  
51  
52 by email and/or telephone in order to set up interviews. Letters of introduction were then  
53  
54 emailed informing participants of the purpose of this study and seeking their consent to  
55  
56  
57  
58  
59  
60

1  
2  
3 participate. All fifteen individuals approached agreed to be interviewed for the study. Although  
4  
5 the participants purposely represent a diverse range of organizations, they share common  
6  
7 interests and knowledge in nutrition and health; they were also high-ranking representatives  
8  
9 holding leadership positions in their organizations.  
10  
11

12  
13 Semi-structured interviews were conducted in the capital Dakar at the offices of the  
14  
15 participants (except for one interview conducted in the United States by telephone) in the  
16  
17 summer of 2010. Informed consent was obtained verbally at the start of the interview. These  
18  
19 interviews were guided by a prepared survey instrument developed exclusively for this study,  
20  
21 although key experts were encouraged to discuss the issues pertaining to MNDs from their  
22  
23 perspectives. The survey included one question designed to gauge the perceived level of  
24  
25 political priority for MNDs using a Likert scale. Interviews lasted around one to two hours.  
26  
27 When possible and permitted interviews were recorded, otherwise contemporaneous notes were  
28  
29 taken which were then immediately written up following the interview. Interviews were  
30  
31 primarily carried out in English, although in some interviews a mixture of English and French  
32  
33 was used.  
34  
35  
36  
37  
38

39 Each of the recorded interviews was transcribed. The interview transcripts and notes were  
40  
41 examined and content analysis performed from which themes relevant to the research question  
42  
43 identified. These were coded, applying an emic coding approach, based on methodology based  
44  
45 on grounded theory.[19] In order to verify the themes that arose, sections of interview  
46  
47 transcripts were also reviewed by other researchers (students enrolled in either masters or  
48  
49 doctoral degree programs taking a qualitative methods course) during the data analysis stage to  
50  
51 confirm the reliability of the coding and emergent themes during this inductive process.  
52  
53  
54  
55  
56  
57  
58  
59  
60

1  
2  
3  
4  
5  
6  
7  
8  
9  
10  
11  
12  
13  
14  
15  
16  
17  
18  
19  
20  
21  
22  
23  
24  
25  
26  
27  
28  
29  
30  
31  
32  
33  
34  
35  
36  
37  
38  
39  
40  
41  
42  
43  
44  
45  
46  
47  
48  
49  
50  
51  
52  
53  
54  
55  
56  
57  
58  
59  
60

These data was then entered into a spreadsheet, where the themes from internal stakeholders (from within the national government institutions) and external stakeholders (from outside national government) were grouped separately. This spreadsheet facilitated further analysis and identification of the perceived factors that facilitated or obstructed political priority for micronutrients.

This study was approved by the Institutional Review Board of Harvard School of Public Health.

## RESULTS

The perceived level of political priority for MNDs on the national health agenda varied between participants, both within and outside national government. When asked to estimate the current level of priority (very low/low/medium/high/very high), the level of priority for internal stakeholders ranged from “very low” to “high,” and for external stakeholders ranged from “low” to “high.” Internal stakeholders were more likely to rank the level of priority afforded to MNDs as “medium” compared to “high” from external stakeholders. Participants from institutions whose mission was primarily related to nutrition and MNDs were more likely to perceive that MNDs occupied a lower level of priority on the national development agenda.

Several themes emerged from the data analysis, revealing the factors affecting the level of national priority afforded to MNDs, and factors affecting the implementation of MNDs policies. These were classified into facilitating and impeding factors, and ranked according to the frequency with which these were discussed. Facilitating factors were those that promote the creation and/or maintenance of political priority for MNDs, whereas impeding factors were those



1  
2  
3 that curtailed development of political priority for MNDs. These factors are summarized in  
4  
5 **Table 2**, and detailed below.  
6  
7

8  
9  
10 **Factors facilitating agenda setting for micronutrient deficiencies:**  
11

12  
13 **Multiple stakeholders to collectively advocate for the issue**  
14

15 As in many low and middle-income countries, a large network of stakeholders work in  
16 nutrition in Senegal. All participants discussed the complexity of the partnerships between  
17 stakeholders working in MNDs and the necessary coordination required to achieve results in this  
18 sector. This required close coordination between the various divisions in the lead ministry  
19 (Ministère de la Santé, de la Prévention et de l'Hygiène Publique, MOH), between the MOH and  
20 external stakeholders, and between external stakeholders. The benefits of multiple stakeholders  
21 working towards the same goals were highlighted, both in collectively generating attention for  
22 the issue, capitalizing on their comparative strengths and technical capabilities to champion the  
23 issue with national policymakers. This was enabled by the shared understanding of the issue and  
24 aligned narrative.  
25  
26  
27  
28  
29  
30  
31  
32  
33  
34  
35  
36  
37

38 For example, one external institution saw advocacy for MNDs as critical, stating this as  
39 part of their mission to increase priority for micronutrients: *“the key is to raise awareness and*  
40 *build capacity in the ministry, and to help provide the resources to integrate this [MNDs] into*  
41 *day to day delivery...by working with other partners we can drive the government to deliver.”*  
42  
43  
44  
45  
46  
47

48 The technical expertise and practical assistance from external stakeholders provided great  
49 support for this issue both at the policy and implementation level. Both internal and external  
50 stakeholders commented on the benefits of working together. The close community of technical  
51 experts allowed for sharing of knowledge and best practices, and these stakeholders were  
52  
53  
54  
55  
56  
57  
58  
59  
60

1  
2  
3 therefore able to come together to generate a more focused and combined approach to advocate  
4  
5 for MNDs to have higher priority of the government agenda.  
6  
7  
8  
9

### 10 **Availability of MND indicators to raise awareness and quantify issue severity**

11  
12 Universally participants raised the importance of credible indicators in measuring MNDs  
13 severity and in evaluating and quantifying the impact of programmatic interventions. The  
14 Senegal Demographic and Health Survey (DHS), a nationally representative survey which has  
15 specific indicators relating to MNDs, was frequently referred to, which may have also reflected  
16 the fact that the MOH and other stakeholders were actively preparing for implementation of the  
17 next survey.  
18  
19  
20  
21  
22  
23  
24  
25  
26

27 The availability of data was also seen as important to raising awareness of and advocating  
28 for the issue of MNDs. For example, one external stakeholder explained: *“Senegal, is trying to*  
29 *move forward in its development. They [MOH] are trying to look more at the indicators, for*  
30 *example malnutrition is high, and so therefore they want to change this... Therefore there is high*  
31 *priority of nutrition in the country...”* The timeliness of such data was also important, as one  
32 internal stakeholder mentioned: *“fresh country results are important.”* Other internal and  
33 external stakeholders discussed the challenges facing the delivery of timely, complete and  
34 accurate data from the local level to the ministry and other stakeholders. Participants commonly  
35 referred to indicators relating to anemia (iron deficiency is a major cause of anemia) and Vitamin  
36 A, only rarely did they directly comment on iodine and zinc, and none commented directly on  
37 folic acid deficiency.  
38  
39  
40  
41  
42  
43  
44  
45  
46  
47  
48  
49  
50  
51  
52

53 Compared to interest with the Millennium Development Goals (MDG) indicators, interest  
54 in MNDs indicators by policymakers was seen as lacking. As another participant commented:  
55  
56  
57  
58  
59  
60

1  
2  
3 “MDG indicators are on high-level documents and it helps to get financing for these activities  
4 and it also helps the government to be aware of nutrition. It was a very good idea [laughs]. But  
5  
6 for micronutrients it is lacking, maybe we could improve this... We could have indicators  
7  
8 involving micronutrients.”  
9  
10  
11  
12  
13  
14

### 15 **Transnational advocacy activities around MNDs**

16  
17 On the whole participants felt that global policy agendas and policy documents, such as  
18 the Millennium Development Goals, ‘United Call to Action on Vitamin and Mineral  
19 Deficiencies’ or ‘Repositioning Nutrition as Central to Development’ [20], did influence the  
20 Senegalese national health policy agenda as it relates to nutrition and MNDs. The main  
21 mechanism for this was thought to be through financial and technical resources driven by  
22 external stakeholders.  
23  
24  
25  
26  
27  
28  
29  
30

31  
32 Commitments to achieve the MDGs helped to align different stakeholders working in  
33 health as to the importance of nutrition in achieving these goals, which has also had a positive  
34 impact on addressing micronutrient deficiencies as well. One internal participant said “Nutrition  
35 has a role to play in all the [Millennium Development] Goals. It is very important. I think at the  
36 beginning [of the MDG process] the role of nutrition was not that clear, but now things are  
37 different...For women and children, it is very very very important to achieve the MDGs.”  
38  
39  
40  
41  
42  
43  
44  
45

46 Transnational global health activities have helped with the advocacy for the role of nutrition; one  
47 participant expressed this saying, “For MNDs and nutrition globally, we use The Lancet to talk  
48 with the authorities. We use the global action plan for nutrition. It is a good way, if we use what  
49 is going on at the international level in our countries, all those results and all those information  
50 as advocacy materials to get political will.” Another stated that “with the global agenda, there is  
51  
52  
53  
54  
55  
56  
57  
58  
59  
60

1  
2  
3 *evaluation and therefore things are improving,*” indicating the transnational influence of  
4  
5 monitoring and evaluation and achieving targets.  
6  
7

8 Senegal signed up to the Call to Action on vitamin and micronutrient deficiencies in  
9  
10 January 2010. Support for this came from the highest level within the lead ministry with the  
11  
12 Minister of Health and Prevention in Senegal joining with other key stakeholders to launch the  
13  
14 report, “Investing in Senegal's Future: A United Call to Action on Vitamin and Mineral  
15  
16 Deficiencies.” This report specifically calls for increased commitment to MNDs, together with  
17  
18 the investment in sustainable partnerships between stakeholders. [11] Although none of the  
19  
20 internal stakeholders thought that this had impact on behavior, the impact perceived by external  
21  
22 stakeholders thought that this had impact on behavior, the impact perceived by external  
23  
24 stakeholders was mixed. For example, one external stakeholder commented, “*I think that this*  
25  
26 *[Call to Action] had impact. It reinforced for all stakeholders the importance of micronutrients.*  
27  
28 *There was a real impact and the advantage is that this is the way to advance the agenda and to*  
29  
30 *emphasize the importance.*” Other external stakeholders thought that the impact was minimal or  
31  
32 hard to gauge. Although the severity of MNDs gained the attention of policymakers at the time  
33  
34 of the launch, translating this into successful implementation was the main barrier identified by  
35  
36 external stakeholders, especially those involved with implementation.  
37  
38  
39  
40  
41  
42

#### 43 **Factors impeding agenda setting for micronutrient deficiencies:**

44  
45 From stakeholder interviews, five key factors were identified that seemed to hinder generation of  
46  
47 political priority for MNDs; these are summarized below.  
48  
49

#### 50 **Issue invisibility: lack of awareness among policymakers and civil society**

51  
52 Stakeholders commented on the particular challenge relating to issue visibility and the  
53  
54 “hiddenness” of MNDs. This extended from policymakers to civil society. As one external  
55  
56  
57  
58  
59  
60

1  
2  
3 stakeholder asked, *“Are all the stakeholders aware of the importance of micronutrients? For*  
4 *health? Economic growth? Regarding the well-being of the nation?. It is a question of*  
5 *awareness and political will, and maybe a question of difference sectors working all together.”*

6  
7  
8  
9  
10 Similarly, another external stakeholder commented, *“At the policy level, it is a matter of*  
11 *awareness, information, and education on the issue;”* while another stated that *“At the ministry,*  
12 *there is no decision maker who asks for micronutrient indicators, say compared to*  
13 *immunizations etc.”* This was contrasted to other global health issues such as maternal mortality  
14 and HIV/AIDS where the disease burden and impact were more “visible.”

15  
16  
17  
18  
19  
20  
21  
22 Universally stakeholders interviewed agreed that there is a lack of public awareness about  
23 nutrition and micronutrients, stating that there has been little attempt to mobilize civil society to  
24 press for progress in this issue. Some marketing campaigns are in place and were mentioned,  
25 such as fortified foods for infants, and national alliances to promote food fortification, but their  
26 impact is not known. This in part reflects the subclinical presentation of MNDs. As one internal  
27 participant noted, *“If you have micronutrient deficiencies you can’t see it. Say you have anemia*  
28 *– when you go to the health system you are given medicine but you can’t see it - You can have*  
29 *anemia all your life and not know it. The consequences are not visible most of the time.”*

30  
31  
32  
33  
34  
35  
36  
37  
38  
39  
40  
41 Participants discussed the need to encourage public awareness to the public: for example, *“the*  
42 *beneficiaries[civil society] also need to see this and the benefits of results ... you know for*  
43 *comparison, for roads or for the wheels for water, they see it – they know it – you see that you*  
44 *need it for everything - they see the health huts and health centers and see that. But for*  
45 *micronutrients – you don’t see it.”* Thus for MNDs, the characteristics of the issue and the  
46  
47  
48  
49  
50  
51  
52  
53  
54  
55  
56  
57  
58  
59  
60 “hidden” presentation has implications for its visibility at the policy level and for civil society.

### Issue complexity: multisectoral solutions required to address MNDs

Another challenge participants identified is the multisectoral nature of the necessary interventions to deal with MNDs. This spans ministries and although there is a specific taskforce on addressing malnutrition in Senegal, coordinating a response is difficult. Furthermore, there were inconsistencies in the perceptions of who should take leadership and responsibility for this issue, and what the policy solutions should be. One internal stakeholder expressed the opinion that the MOH should not be the main overseer of nutrition, as prevention (rather than treatment) should be championed and therefore it should fall most under the remit of the Ministries of Agriculture, Industry and Education. He indicated *“It is a multisectoral issue, maybe health is doing its role, but there are other sectors that may not be doing so. I think that in Senegal we need a better approach. We have not yet defined what it should be... There are different sectors with different responsibilities, and we need to do this exercise to define the issue and then the level of priority. For example, with anemia, you have to work on the agriculture, industry – they all have responsibilities and roles – many other sectors - as the MOH is there to see the problems – it just works on the end.”* Another participant commented on collaboration between internal and external sectors, saying *“We have to join efforts between the MOH and industry and the private sector – health alone won’t be able to reduce this significantly. The MOH works on the consequences of MNDs, they are at the end, and it’s a big deal for the MOH.”*

These views reflect the difficulties that extend from the multisectoral nature of the issue in terms of coordinating the complex array of actors working in nutrition and health, and who should take responsibility for overseeing this issue, both in terms of prevention versus treatment and public versus private sector involvement. This is further complicated by the different agendas and priorities that these external partners may have. As one internal stakeholder

1  
2  
3 commented, “*sometimes you face difficulties as they have different agendas, so you have to have*  
4 *a good sense of flexibility and adaptability as an organization.*” Operationally, coordination  
5  
6 means that much time is spent in meetings and significant ministerial capacity is reportedly spent  
7  
8 “*in meetings and doing report preparation, rather than the actual work.*” One external  
9  
10 stakeholder commented, “*If you go to into X [referring to a MOH Division], no-one else is there*  
11  
12 *as they are all out with different partners. It is very difficult to manage.*” All external  
13  
14 stakeholders interviewed however were sympathetic to the limitations of the ministerial capacity  
15  
16 to deal with competing priorities and the burden of work, given the limited human and  
17  
18 operational resources.  
19  
20  
21  
22  
23  
24  
25  
26  
27

### 28 **Lack of adequate resources to support MNDs: trapped in a ‘low priority’ cycle**

29  
30 Lack of financial, human and physical resources to support MNDs initiatives and their  
31  
32 scaling up were stated as a major challenge to actually realizing higher political priority for  
33  
34 MNDs. Both internal and external stakeholders commented on lack of resources compounding  
35  
36 the difficulty of integrating MNDs policy solutions into the day to day delivery of existing  
37  
38 programs, which meant that the issue was stuck as a low priority issue,[21] with lack of  
39  
40 budgetary commitment to support advocacy efforts for higher prioritization of the issue.  
41  
42  
43

44 The interviews with the internal stakeholders revealed four challenges: firstly, the  
45  
46 inadequate financial commitments to MNDs from the government, which made the MOH very  
47  
48 dependent on external partners to support this agenda. Although necessary, this, in their opinion,  
49  
50 had limited the ability to develop and implement a longer term vision for MNDs. Secondly,  
51  
52 [that] “*the resources are not sufficient to implement the programs, [and thirdly,] the other is the*  
53  
54 *coordination of existing resources. We need to use these efficiently, with better coordination of*  
55  
56  
57  
58  
59  
60

1  
2  
3 *the existing resources. We have to do better, and put in enough effort to use resources*  
4  
5 *rationally...It is really important to coordinate better – interventions and resources”*. Fourthly,  
6  
7  
8 financing vertical programs reportedly compromised a more holistic approach to tackle MNDs,  
9  
10 and also limited the flexibility for resource allocation.  
11

12  
13 More positively, new global funds earmarked for nutrition, and the collective support of  
14  
15 the external stakeholders meant that gaps in service delivery where possible could be addressed  
16  
17 by different partners working together.  
18  
19  
20  
21

## 22 **Lack of a champion to advocate for the issue and institutional weakness of the lead** 23 24 **ministry**

25  
26  
27 A specific issue raised was the lack of an individual or champion to “push” for MNDs  
28  
29 from within the ministry. Building on the preceding theme, lack of resources were felt to further  
30  
31 compound the effectiveness of the lead institution. Six out of the eight external stakeholders  
32  
33 identified poor leadership capacity of the MOH as an obstructing factor facing priority setting for  
34  
35 MNDs and the development and implementation of related policy solutions, whereas only two of  
36  
37 seven internal stakeholders raised this issue. Furthermore, stakeholders commented on the lack  
38  
39 of a clear strategic plan for MNDs, with limited leadership capacity to manage the necessary  
40  
41 multisectoral response and coordinate multiple stakeholder involvement for MNDs. One  
42  
43 external stakeholder commented: *“This [MNDs] requires a high level of leadership from the*  
44  
45 *ministry .... there is a certain level of leadership, but this needs to be developed more to bring all*  
46  
47 *available resources to implement the interventions priority, by priority, which should be defined*  
48  
49 *by the MOH. This is really important...”* Similarly, another external stakeholder stated, *“It is a*  
50  
51 *question of leadership. They [MOH] need to have a very strategic plan, it is very important,*  
52  
53  
54  
55  
56  
57  
58  
59  
60



1  
2  
3 *because with the implementation plan, and with monitoring and evaluation, it is important for*  
4 *the MOH to coordinate all the support. It is not easy [laughs] ...it is a challenge.”*  
5  
6  
7

8 The internal stakeholders who specifically commented on leadership from the lead  
9 institution did however state how they are attempting to address this issue and build up the  
10 ministerial leadership capacity through various training initiatives.  
11  
12  
13

### 14 15 16 17 **Challenge of demonstrating effectiveness of interventions for MNDs to reinforce advocacy** 18 **efforts** 19

20  
21  
22 Despite the theoretical existence of effective interventions for MNDs, implementation  
23 was identified by participants as a key challenge in the Senegalese context. The need to show  
24 the effectiveness of interventions was critical, yet difficulties with data and information systems  
25 hindered pursuit of this. As an internal stakeholder pointed out, *“We have many problems with*  
26 *data. Data is very important to identify better interventions and to allocate resources...we have*  
27 *some problems, especially at the health facilities level to monitor here – there are sometimes*  
28 *lack of materials to collect such data, and I know the ministry is trying to improve this fact. If we*  
29 *lack data, we will always have problems. This is important for monitoring key indicators, and*  
30 *necessary for operations... All partners are interested in this.”* The problems with data  
31 collection identified by interviewees included, the lack of supervision at the community level for  
32 collecting data, poor reporting resulting from limited training, capacity, lack of job awareness  
33 and lack of transfer of data centrally leading in information and data loss.  
34  
35  
36  
37  
38  
39  
40  
41  
42  
43  
44  
45  
46  
47  
48  
49

50 Stakeholders reiterated the importance of demonstrating success to strengthen advocacy:  
51 *“For advocacy you need results. The best way to advocate is to show results and that it works.*  
52 *At the moment we don’t have the evidence to show this... it is very difficult.”* The pressure to  
53  
54  
55  
56  
57  
58  
59  
60

gather data for monitoring and evaluation to show the effectiveness of their interventions was highlighted by external stakeholders working on the implementation side. Evaluating the impact of programs was seen as important for securing continued donor support. *“Results can help the process to improve. With results, then they [partners and donors] will come. Each donor or partner wants results. With results, then they will come. It’s not complicated,”* an internal stakeholder explained.

## DISCUSSION

### Factors influencing national political priority for micronutrient deficiencies

This qualitative study identified several factors affecting the political prioritization process for micronutrient deficiencies from the perspective of key experts working in this field. In doing so, it offers some explanation as to why the issue of MNDs has struggled to gain political attention and make it onto the policy agenda. Interestingly, this study also identified that the perceived level of political priority for MNDs varied considerably between key stakeholders involved in the field of nutrition and health in Senegal. This may reflect the perceptions of the individuals representing these organizations, or may be the result of, or consequence of, how the issue of MNDs is understood and framed by the national policy community. This qualitative analysis therefore raises questions into the complex relationship between perceptions of political priority and the agenda setting process for MNDs.

Relating the study’s findings to the existing theoretical literature yields some additional insights. For an issue to gain political priority on the government agenda, Kingdon’s theory of agenda setting argues that, three independent streams need to converge: the problem stream, where an issue becomes perceived as a problem that needs to be and can be addressed compared

1  
2  
3 to other competing priorities; the policy stream, where a set of alternative policy solutions are  
4 proposed to address the problem; and the politics stream, where political events create a window  
5  
6 of opportunity for policy reform.[10]  
7  
8  
9

10 In this case, in the problem stream, credible indicators that objectively quantified the  
11 severity of the issue were used by the policy community to highlight the prevalence of MNDs.  
12 This was supported by advocacy efforts that used calculations of DALYs lost due to MNDs and  
13 the benefit:cost ratios to support investing in reducing micronutrient deficiencies. However,  
14 several factors impeded progress – these mainly relate to the characteristics of the problem or  
15 issue itself. First, the “hiddenness” of MNDs diminished the visibility of this issue, posing a  
16 challenge to MNDs commanding the sustained attention of civil society and policymakers. This  
17 is in contrast, for example, to HIV/AIDS where the impact on people, societies and economies  
18 are highly visible, and facilitated generating attention and support for the issue.[22] Second, the  
19 typical chronic nature of MNDs does not command a sense of urgency to act, for example  
20 compared to acute epidemics or famines. Third, although global evidence to support effective  
21 interventions were available, the lack of country-level evidence and inability to demonstrate  
22 clear results from policy and programmatic actions impeded advocacy efforts to address the  
23 issue. Policymakers, in order to get behind the issue need to be convinced of its feasibility, with  
24 investment in political capital bringing about positive results rather than taking the risk of  
25 backing more complex or challenging issues.  
26  
27  
28  
29  
30  
31  
32  
33  
34  
35  
36  
37  
38  
39  
40  
41  
42  
43  
44  
45  
46  
47

48 In the policy stream, we see that the policy community, although diverse, was cohesive.  
49 All stakeholders commented on the collective efforts in advocating for MNDs, and how this  
50 strengthened their ability, harnessing their individual strengths, to champion the issue. It was  
51 also opportune to champion all MNDs together as one group, rather than individual deficiencies.  
52  
53  
54  
55  
56  
57  
58  
59  
60

1  
2  
3 However, two impeding factors were identified. First, the institutional weakness of the lead  
4 ministry, which lacked resources and capacity to take on this issue; and, second, the complexity  
5 of the policy solutions required to address MNDs. Stakeholders were agreement that a  
6 multisectoral response with multiple solutions was required, with the need for multi-stakeholder  
7 involvement to address different micronutrient deficiencies. This added another layer of  
8 complexity, both technically and operationally, to delivering an effective multifaceted response.  
9 In the Senegalese setting, there were difficulties in ensuring the timeliness, accuracy and  
10 completeness of data to demonstrate the effectiveness of policy responses. This was compounded  
11 by the limited leadership capacity of the lead ministry to coordinate stakeholders and activities,  
12 to maximize the potential of such partnerships and to bring other ministries to the table to tackle  
13 the issue.  
14  
15  
16  
17  
18  
19  
20  
21  
22  
23  
24  
25  
26  
27  
28

29 In the politics stream, no clear political transitions were discussed by stakeholders that  
30 could present a window of opportunity for reform. Nor was there evidence of a policy advocate,  
31 a person who was actively championing the issue of MNDs, or of civil society organizations  
32 pushing for this problem to be addressed. The concentration of MNDs among vulnerable groups  
33 of women and children is critical: these groups are less politically empowered and have limited  
34 electoral power to command priority from policymakers. Furthermore, as many of those afflicted  
35 by MNDs are unaware of the disease burden, it is even more challenging to mobilize interest  
36 groups around this issue.  
37  
38  
39  
40  
41  
42  
43  
44  
45  
46  
47

48 Because of the impeding factors in the each stream, this analysis demonstrates why  
49 MNDs have failed to sustainably command the attention of decision makers. Application of  
50 Kingdon's theory provides a useful framework for analysis, however it has limitations. First, as it  
51 is based on national agenda setting in the context of the American political system, it may not  
52  
53  
54  
55  
56  
57  
58  
59  
60

1  
2  
3 capture the different dynamics and complexity of political systems in low and middle-income  
4 countries.[23] Second, as this study demonstrates, it is perhaps over-simplistic: facilitating and  
5  
6  
7  
8  
9  
10  
11  
12  
13  
14  
15  
16  
17  
18  
19  
20  
21  
22  
23  
24  
25  
26  
27  
28  
29  
30  
31  
32  
33  
34  
35  
36  
37  
38  
39  
40  
41  
42  
43  
44  
45  
46  
47  
48  
49  
50  
51  
52  
53  
54  
55  
56  
57  
58  
59  
60

capture the different dynamics and complexity of political systems in low and middle-income countries.[23] Second, as this study demonstrates, it is perhaps over-simplistic: facilitating and impeding factors often overlap and interact between in the three streams, and the agenda-setting stage of the policy cycle may also interact with other stages, such as implementation. Third, this theory of national agenda setting does not include interactions between global agenda-setting activities and national-level processes.

### **Global agenda setting activities influencing national policy processes**

The importance of global agenda-setting activities at the national level was a key theme raised by this analysis. This theme has been raised in the applied literature examining the priority of global health issues on national agendas.[11,24,25,26] Shiffman highlighted the importance of ‘transnational influences’ whereby norm promotion and resource provision can influence the degree to which an issue appears on the national agenda.[11]

In the case of MNDs in Senegal, several themes around global influences were highlighted. First, was the use of internationally-recognized evidence base on effective solutions for MND, (for example, Lancet series on nutrition) which resonated well with the policy community, giving them cogent arguments to support their advocacy effort with decision makers. Second, was the impact of donor funding on influencing national priorities. Although, some stakeholders criticized the lead ministry for not taking command, stakeholders also commented on the role of external donors who influence the agenda through their own priorities and resource allocation. Donor agendas were purported to undermine the empowerment of the ministry to take charge of deciding which competing priorities should receive funding allocation. Third, was the influence of global advocacy for MND: the local launch of the *Call to Action on*

1  
2  
3  
4  
5  
6  
7  
8  
9  
10  
11  
12  
13  
14  
15  
16  
17  
18  
19  
20  
21  
22  
23  
24  
25  
26  
27  
28  
29  
30  
31  
32  
33  
34  
35  
36  
37  
38  
39  
40  
41  
42  
43  
44  
45  
46  
47  
48  
49  
50  
51  
52  
53  
54  
55  
56  
57  
58  
59  
60

*Vitamin and Mineral Deficiencies* provided a forum to garner support and galvanize how the issue was framed both among the policy community and to broader audiences, including the private sector, who through public-private partnerships, particularly those relating to food fortification, have an important role to play in addressing MNDs. While the issue of MND gained the attention of policymakers at the time of the launch, none of the internal stakeholders thought that this had impact: the challenge of translating this into sustained political prioritization for MNDs remained.

### Limitations

This qualitative study has limitations. As with all case studies, it is not possible to generalize these findings to other contexts. However, it is likely that many of the findings are transferable to other settings, particularly the broader themes relating to issue characteristics and issue complexity of MNDs. In other low and middle-income countries burdened with MNDs, several of the other themes may also resonate, such as those relating to multisectoral coordination required to deliver solutions and advocacy through a policy champion or entrepreneur. Second, are issues relating to the study methodology. Not all interviews were recorded which may have limited the ability to delineate nuances available from transcribed interviews. Also, due to operating in two languages at times, some subtle understanding of issues may not have been clearly denunciated, especially as many of the participants were not using their native language. Although stakeholders interviewed for this study represent the array of institutions working in micronutrients, it may be possible that other representatives from these same institutions or other institutions or sectors, such as from finance and agriculture, could have added further insights to the study's findings. No representative from the private sector was

1  
2  
3 interviewed due to logistical reasons, which was an omission. Also, the data collection and  
4  
5 analysis was conducted in 2010, so the study findings may be less relevant to today's context.  
6  
7  
8 Third, the author's positionality having been introduced with a letter of introduction from the  
9  
10 lead ministry, and being an outsider may have affected how participants responded. Moreover,  
11  
12 personal connections through shared disciplinary backgrounds (physicians or researchers) with  
13  
14 different participants may have differentially altered their responses, for example, greater  
15  
16 openness with the author because of shared bonds. Fourth, as the data collection and analysis  
17  
18 was carried out by one researcher, this may have increased the likelihood of bias. To mitigate  
19  
20 this, interview transcripts were independently reviewed by other researchers to confirm the  
21  
22 reliability of the coding and themes emerging from the data.  
23  
24  
25  
26  
27  
28

### 29 **Implications of the study**

30  
31 This analysis does offer some insight into the factors affecting agenda setting which  
32  
33 could help with devising political strategies to help prioritize addressing MNDs, at both national  
34  
35 and global levels. An interesting finding was that many stakeholders interviewed were not  
36  
37 acutely cognizant of political process relating to agenda setting for health policy, and were  
38  
39 interested in this research question and the potential implications of this research. To this end, it  
40  
41 is also important for the policy and technical community to be aware of the politics around the  
42  
43 policy process and build capacity to navigate the political policy process.[27] This could take  
44  
45 advantage of the existing methods and tools that already exist to conduct a political analysis for  
46  
47 food and nutrition security,[26] and generate recommendations to enhance the political  
48  
49 feasibility of efforts to champion MNDs. This study revealed the absence of a political strategy  
50  
51 to advance prioritization of MNDs.  
52  
53  
54  
55  
56  
57  
58  
59  
60

1  
2  
3  
4  
5  
6  
7  
8  
9  
10  
11  
12  
13  
14  
15  
16  
17  
18  
19  
20  
21  
22  
23  
24  
25  
26  
27  
28  
29  
30  
31  
32  
33  
34  
35  
36  
37  
38  
39  
40  
41  
42  
43  
44  
45  
46  
47  
48  
49  
50  
51  
52  
53  
54  
55  
56  
57  
58  
59  
60

Some broad recommendations to increase the political priority of MNDs could include actions to: identify and support a champion to strongly advocate for micronutrient deficiencies; promote greater attention to micronutrient deficiencies among civil society, for example, through education activities or through mass media and social media, to increase awareness of the issue and its consequences; support policy communities to work together to devise strategies that best capitalise on their collective strength and doing so push national officials to commit to specific actions; take advantage of focusing events both nationally and globally that could promote the issue; focus on carefully monitoring and evaluating MND policies and programmes, and documenting successes so as to demonstrate effective and feasible policy solutions to demonstrate to policymakers. These strategies would need to be tailored to the specific context and policy environment around MNDs.

### **Future study of global and national political prioritization processes for global health issues**

This study contributes to the growing literature that attempts to understand the variation in the priority and attention granted to different global health issues, using the hitherto unstudied case study of micronutrient deficiencies. As more and more global and national actors vie to promote priority for their valued issues, the process of priority setting at the national level is becoming increasingly complex. This raises a number of questions and issues. On an academic level, it exposes the shortcoming of existing theories to understand the policy process for global health, with need to develop theories or adapt existing theories to help shape our understanding of global health agenda-setting. On a practical level, it raises the broader issue of the implications of siloed efforts to promote different agendas within global health. While there are



1  
2  
3 advantages in advocating for specific issues, it is not clear whether fragmented advocacy efforts  
4  
5 in nutrition, for example, for MNDs or exclusive breastfeeding or child overweight and obesity,  
6  
7 detract from bringing about more integrated and coordinated progress in nutrition or  
8  
9 development more broadly. Moreover, it is unknown whether competing priorities vying for  
10  
11 attention result in “attention fatigue” and whether national policymakers become refractory to  
12  
13 repeated calls to action. Further theoretical and applied work could explore these issues.  
14  
15  
16  
17  
18  
19  
20  
21  
22  
23  
24  
25  
26  
27  
28  
29  
30  
31  
32  
33  
34  
35  
36  
37  
38  
39  
40  
41  
42  
43  
44  
45  
46  
47  
48  
49  
50  
51  
52  
53  
54  
55  
56  
57  
58  
59  
60

## ACKNOWLEDGEMENTS

The author expresses thanks to the key experts who kindly participated in this study and the Council of Women World Leaders. In addition, the author would like to thank Vanessa Fong, Christina Smiraglia and classmates at the Harvard Graduate School of Education for verifying the data analysis and reviewing earlier drafts of this paper. Finally, the author thanks Donald Halstead for thoughtful comments that greatly contributed to this paper.

## CONTRIBUTORSHIP STATEMENT

The sole author meets ICMJE criteria for authorship.

## AUTHOR DISCLOSURES

- YB declares no conflicts of interest and no competing interests.
- The authors has completed the Unified Competing Interest form at [www.icmje.org/coi\\_disclosure.pdf](http://www.icmje.org/coi_disclosure.pdf) (available on request from the corresponding author) and declare that YB has no specified relationships with any companies that might have an interest in the submitted work in the previous 3 years; and YB has no non-financial interests that may be relevant to the submitted work.
- The Corresponding Author has the right to grant on behalf of all authors and does grant on behalf of all authors, a worldwide licence to the Publishers and its licensees in perpetuity, in all forms, formats and media (whether known now or created in the future), to i) publish, reproduce, distribute, display and store the Contribution, ii) translate the Contribution into other languages, create adaptations, reprints, include within collections and create summaries, extracts and/or, abstracts of the Contribution, iii) create any other derivative work(s) based on the Contribution, iv) to exploit all subsidiary rights in the Contribution, v) the inclusion of electronic links from the Contribution to third party material where-ever it may be located; and, vi) licence any third party to do any or all of the above.
- This study was approved by the Institutional Review Board of the Harvard School of Public Health. Protocol #: 19491-101. All participants gave informed consent before taking part.
- This study was not supported by a specific grant. The author was a recipient of a Fellowship from the Council of Women World Leaders, Washington D.C. The fellowship program had no role in the study design; in the collection, analysis, and interpretation of data; in the writing of the report; and in the decision to submit the article for publication.
- YB had full access to all of the data in the study and can take responsibility for the integrity of the data and the accuracy of the data analysis. Data sharing: no additional data available.

- YB affirms that the manuscript is an honest, accurate, and transparent account of the study being reported; that no important aspects of the study have been omitted; and that any discrepancies from the study as planned (and, if relevant, registered) have been explained.

## DATA SHARING STATEMENT

No additional data available

## REFERENCES

1. Unicef (2013) Improving child nutrition: The achievable imperative for global progress. New York, NY, USA: UNICEF: 18.
2. Initiative M (2009) Investing in the future: A united call to action on vitamin and mineral deficiencies Ottawa: Micronutrient Initiative.
3. Ezzati M, Lopez AD, Rodgers AA, et al. (2004) Comparative quantification of health risks : global and regional burden of disease attributable to selected major risk factors. Geneva: World Health Organization. 2 v. (2248 p.)+ v.2243 in 2241CD-ROM . p.
4. Murray CJ, Vos T, Lozano R, et al. (2012) Disability-adjusted life years (DALYs) for 291 diseases and injuries in 21 regions, 1990-2010: a systematic analysis for the Global Burden of Disease Study 2010. *Lancet* 380: 2197-2223.
5. Boy E, Mannar V, Pandav C, et al. (2009) Achievements, challenges, and promising new approaches in vitamin and mineral deficiency control. *Nutrition Reviews* 67: S24-S30.
6. Consensus C (2012) Expert panel findings. Copenhagen Consensus 2012. . Washington, DC: Copenhagen Consensus Center, .
7. Agence Nationale de la Statistique et de la Démographie (ANSD) [Sénégal] eII (2012) Enquête Démographique et de Santé à Indicateurs Multiples au Sénégal (EDS-MICS) 2010-2011. . Calverton, Maryland, USA.: ANSD et ICF International.
8. Walt G, Shiffman J, Schneider H, Murray S, Brugha R, et al. (2008) 'Doing'health policy analysis: methodological and conceptual reflections and challenges. *Health Policy and Planning* 23: 308.
9. Shiffman J, Smith S (2007) Generation of political priority for global health initiatives: a framework and case study of maternal mortality. *The Lancet* 370: 1370-1379.
10. Kingdon J (2002) *Agendas, Alternatives, and Public Policies* (Longman Classics Edition): Longman Publishing Group.
11. Shiffman J (2007) Generating political priority for maternal mortality reduction in 5 developing countries. *American journal of public health* 97: 796-803.
12. Shiffman J (2010) Issue attention in global health: the case of newborn survival. *Lancet* 375: 2045-2049.
13. Geneau R, Stuckler D, Stachenko S, et al. (2010) Raising the priority of preventing chronic diseases: a political process. *The Lancet* 376: 1689-1698.
14. Shiffman J (2003) Generating political will for safe motherhood in Indonesia. *Social Science & Medicine* 56: 1197-1207.
15. Hafner T, Shiffman J (2013) The emergence of global attention to health systems strengthening. *Health policy and planning* 28: 41-50.
16. Shiffman J, Quissell K (2012) Family planning: a political issue. *Lancet* 380: 181-185.
17. Initiative M (January 19, 2010) Investing in Senegal's Future: A United Call To Action On Vitamin And Mineral Deficiencies.
18. BENNETT AA (2005) *Case studies and theory development in the social sciences*: Mit Press.

19. Glaser BG, Strauss AL (2009) The discovery of grounded theory: Strategies for qualitative research: Transaction Books.
20. Shekar M, Heaver R, Lee Y-K (2005) Repositioning Nutrition as Central to the Development Agenda: A Strategy for Large Scale Action: World Bank-free PDF.
21. Natalicchio M (2009) Carrots and sticks: the political economy of nutrition policy reforms: World Bank.
22. Shiffman J (2006) HIV/AIDS and the rest of the global health agenda. *Bulletin of the World Health Organization* 84: 923-923.
23. Court J, Young J (2003) Bridging research and policy: Insights from 50 case studies: Overseas development institute (ODI).
24. Reich MR (1995) The politics of agenda setting in international health: child health versus adult health in developing countries. *Journal of international development* 7: 489-502.
25. Shiffman J, Smith S (2007) Generation of political priority for global health initiatives: a framework and case study of maternal mortality. *Lancet* 370: 1370-1379.
26. Reich MR, Balarajan Y (2012) Political economy analysis for food and nutrition security. HNP Discussion Paper World Bank and SAFANSI, Washington, DC.
27. Fox A, Reich M, editors (2013) Political Economy of Reform: The Art of the Feasible. Washington D.C.: World Bank Publications.

**Table 1: Characteristics of study participants interviewed for this study**

| <b>Stakeholder</b>                            | <b>Organization</b>            | <b>n</b>  |
|-----------------------------------------------|--------------------------------|-----------|
| Internal stakeholders<br>(within government)  | Governmental institutions      | <b>7</b>  |
|                                               | National executive agency      | <b>1</b>  |
| External stakeholders<br>(outside government) | Multilateral institutions      | <b>3</b>  |
|                                               | Bilateral institutions         | <b>1</b>  |
|                                               | Non-governmental organizations | <b>2</b>  |
|                                               | Academia/clinical medicine     | <b>1</b>  |
| <b>Total</b>                                  |                                | <b>15</b> |

**Table 2: Identified factors affecting agenda setting for micronutrient deficiencies (MNDs)**

| <b>Factors facilitating agenda-setting for MNDs</b>                                                | <b>Factors impeding agenda-setting for MNDs</b>                                                |
|----------------------------------------------------------------------------------------------------|------------------------------------------------------------------------------------------------|
| Multiple stakeholders, with aligned framing of the problem, to collectively advocate for the issue | Issue invisibility: lack of awareness among policymakers and civil society.                    |
| Availability of MND indicators to raise awareness and quantify issue severity                      | Issue complexity: multisectoral solutions required to address MNDs.                            |
| Transnational advocacy activities around MND                                                       | Lack of adequate resources to address MND: trapped in a 'low priority' cycle.                  |
|                                                                                                    | Lack of a champion to advocate for the issue and institutional weakness of the lead ministry   |
|                                                                                                    | Challenge of demonstrating effectiveness of interventions for MND to support advocacy efforts. |

1  
2  
3  
4  
5  
6 **Title:** Creating political priority for micronutrient deficiencies: A qualitative [case study from](#)  
7  
8 [Senegal](#)  
9

10  
11  
12  
13 **Author\*:** Yarlini Balarajan  
14

15  
16  
17 **Author's Affiliation:** Department of Global Health and Population, Harvard School of Public  
18  
19 Health. Boston, MA, 02115. USA  
20  
21  
22 [ysb877@mail.harvard.edu](mailto:ysb877@mail.harvard.edu)  
23

24  
25 \*corresponding author  
26

27  
28  
29 **Running head:** political priority for micronutrient deficiencies  
30  
31

32  
33  
34 **Keywords:** micronutrients, political priority, agenda setting, policy process, nutrition,  
35  
36  
37  
38  
39  
40  
41  
42  
43  
44  
45  
46  
47  
48  
49  
50  
51  
52  
53  
54  
55  
56  
57  
58  
59  
60

## ARTICLE SUMMARY

### What is already known

- Micronutrient deficiencies remain a major global health issue affecting women and children in several low and middle income countries (over 50 million disability-adjusted life years lost globally).
- No previous studies have systematically explored what factors influence the agenda-setting process for micronutrient deficiencies, nor the level of political priority afforded to this issue at the national level.

### What this study adds

- This study identifies several factors facilitating and impeding the level of political prioritization for micronutrient deficiencies at the national level. It offers some explanation as to why the issue of micronutrient deficiencies has struggled to gain political attention in Senegal.
- Greater attention to the factors affecting agenda setting can be used to devise political strategies to help prioritize micronutrient deficiencies on national agendas.

### Strengths and limitations of this study

- To the author's knowledge, this is the first exploratory study examining the political prioritization process for the micronutrient deficiencies.



- This study draws on primary data collected from key stakeholders involved in the policy process, and relates the study's findings to the existing theoretical literature to yield some additional insights.
- As with any qualitative case study, it is not possible to generalize the findings to other settings and contexts, [although some findings relating to issue characteristics and issue complexity of micronutrient deficiencies may be transferable to other settings.](#)
- The sample size was not large; however, maximum-variation sampling was applied to recruitment to ensure representation from all the key stakeholders from within and outside national government.

## ABSTRACT

**Objectives:** To examine what factors influence the agenda-setting process for micronutrient deficiencies (MND) and the level of political priority afforded to MNDs.

**Design:** Qualitative case study employing process-tracing, informed by primary data collected from semi-structured interviews with policymakers.

**Setting:** Dakar, Senegal

**Results:** Several facilitating and impeding factors affecting the level of political prioritization for MNDs were identified. Facilitating factors included multiple stakeholders, *each with their respective strengths and capabilities, using aligned framing to collectively advocate for MNDs*; availability of indicators to quantify issue severity and raise awareness; and transnational advocacy activities around micronutrients. Impeding factors included lack of awareness among policymakers and civil society about MNDs; issue complexity, with the need for coordinated multisectoral response *to deliver a complex package of solutions*; lack of resources for competing issues trapping the issue in a 'low priority' cycle; lack of a policy champion to advocate for the issue; and the challenge of demonstrating the effectiveness of interventions to support advocacy efforts.

### Conclusions:

This study gives insight into the political prioritization process for micronutrient deficiencies from the perspective of key *stakeholders* working at the national level in Senegal. In doing so, the study offers some explanation as to why the issue of MNDs has struggled to gain political attention and make it onto the national policy agenda. Moving forward, greater awareness of the factors affecting agenda setting for MNDs may help to devise political strategies to champion this development issue in countries with high burdens of micronutrient deficiencies.

## INTRODUCTION

Vitamin and mineral deficiencies are a leading cause of ill-health, affecting vulnerable populations, especially children and women of reproductive age in low and middle-income countries.[1] Deficiencies of iodine, iron, folic acid, zinc and Vitamin A are sometimes collectively referred to by the term “hidden hunger”[2] – this term, in part, reflects the insidious clinical presentation of micronutrient deficiencies (MNDs). Only a small fraction of those affected by MNDs present with overt clinical signs and symptoms, with the majority having subclinical deficiencies. As a result, MNDs can go unnoticed by individuals suffering from them. Despite this “hiddenness,” MNDs are associated with adverse health and development consequences, contributing to maternal and child mortality and morbidity, physical and intellectual impairment, and loss of work productivity, attributing to over 50 million disability-adjusted life years (DALYs) lost globally.[3,4]

While low-cost, effective interventions to address MNDs exist, progress towards reducing the disease burden associated particularly with iron, folate and zinc deficiencies remains limited,[2] with mixed progress both within and between countries.[5] Yet, in terms of benefit: cost ratios, interventions to address MNDs are deemed the most favorable of all health and development interventions available to improve global welfare.[6] This raises the interesting and important question of why the issue of MNDs has not generated political priority among national policymakers despite the high disease burden and favorable policy solutions. To the author’s knowledge, no previous studies have examined this issue.

Therefore, this study set out to explore the factors determining the national political priority afforded to MNDs. Based on fieldwork conducted in Senegal, it explores how key experts working in nutrition and health perceive the level of political priority afforded to

1  
2  
3 micronutrients in the national health agenda in Senegal, and what factors they consider affect the  
4 process of agenda setting for this issue. In Senegal in 2010-11, an estimated 76% of children  
5 aged 6 to 59 months and 54% of women aged 15 to 49 years were anemic; and an estimated 47%  
6 of households consumed adequately iodized salt,[7] signaling that interventions to address  
7 micronutrient deficiencies are needed to reach vulnerable groups.  
8  
9  
10  
11  
12  
13

### 14 15 16 17 18 **Agenda setting for global health issues**

19  
20 *“It all depends on politics”*

21  
22  
23 – Study participant, Dakar, Senegal

24  
25 Health policy in low and middle-income countries operates in an increasingly complex  
26 environment where global and national actors interact across borders to shape policy and its  
27 implementation. The growing numbers of actors, increased connectivity and networks, and  
28 changing inter-organizational relationships are altering the policy process.[8] A key part of this  
29 policy process is agenda setting - the first stage of the policy cycle -which describes the factors  
30 that influence how issues are defined and prioritized on the policy agenda. Expectedly, there is  
31 variation of the priority and attention granted to different global health issues. However, it is not  
32 fully understood why and what factors drive this variation.[9]  
33  
34  
35  
36  
37  
38  
39  
40  
41  
42

43  
44 Political scientists and public policy scholars have examined the process by which issues  
45 are championed and receive political attention in the agenda-setting stage. Many of these have  
46 drawn on Kingdon’s theory of agenda setting, where the convergence of three different ‘streams’  
47 (problem, policy and politics) increase the likelihood of policy success.[10] More recently,  
48 Shiffman and Smith proposed a framework for determinants of political priority for global health  
49 initiatives.[9] Not theoretically driven, this framework identified 11 variables associated with  
50  
51  
52  
53  
54  
55  
56  
57  
58  
59  
60

1  
2  
3 increased likelihood that a given issue will be placed high on a policy agenda, related to ‘actor  
4 power’, ‘ideas’, ‘political context’ and ‘issue characteristics,’ drawing from factors inductively  
5 derived from study of the issue of maternal mortality across five countries.[11] This work has  
6 led to studies that have explored agenda-setting processes related to different global health  
7 issues, such as maternal health, newborn health, health systems strengthening and family  
8 planning.[9,12,13,14,15,16]  
9

10  
11 By increasing our understanding of the factors influencing agenda setting, it may be  
12 possible to identify opportunities to advance reform and affect the political policy process.  
13 Furthermore, by devising political strategies, there is potential to better advocate for hitherto  
14 neglected global health issues, such as MNDs. Thus, this knowledge may be one way of  
15 responding to the ‘Call to Action’ from the global health and nutrition community to develop and  
16 sustain priority for MNDs on the agenda of national governments.[5] In 2009, a ‘*United Call to*  
17 *Action on Vitamin and Mineral Deficiencies*’ was endorsed by multiple stakeholders working in  
18 the field, which set forth the case for investing in addressing MNDs and united global advocacy  
19 efforts. The global launch was followed by national launches in four countries, Bangladesh,  
20 Kenya, Pakistan and Senegal, in an attempt to increase commitment for MNDs and develop  
21 sustainable partnerships between national government and other stakeholders.[17] The case  
22 study of Senegal was selected for this study as this was one of the countries where a national  
23 launch of the global call to action was held, providing an opportunity to also explore how global  
24 agenda-setting processes influence the national policy process.  
25  
26  
27  
28  
29  
30  
31  
32  
33  
34  
35  
36  
37  
38  
39  
40  
41  
42  
43  
44  
45  
46  
47  
48  
49

## 50 **METHODS**

51  
52 This case study used process-tracing, a qualitative method used by political and social  
53 scientists, that can be applied to assess complex processes where multiple factors may interact to  
54  
55  
56  
57  
58  
59  
60

1  
2  
3 cause effects.[18] Process-tracing is appropriate for within-case analysis and particularly useful  
4  
5 for examining complex issues, such as the policy process; and understanding and exploring  
6  
7 historical events, such as the national launch of a global ‘Call to Action’ on micronutrient  
8  
9 deficiencies.  
10  
11

12  
13 Multiple data sources were triangulated to minimize systematic bias: primary data  
14  
15 collected from semi-structured interviews with high-level representatives from key institutions  
16  
17 involved in policymaking; and secondary data from systematic review of government policy  
18  
19 documents, national surveys, donor reports and published research relating to MNDs.  
20  
21

22  
23 Primary data collection was carried out in Dakar, Senegal. High-level representatives  
24  
25 involved in policymaking and implementation of policies concerning nutrition and health in  
26  
27 Senegal were eligible for inclusion in this study. In order to gauge the widest possible range of  
28  
29 stakeholder perspectives, maximum-variation sampling was applied to recruitment. This  
30  
31 included perspectives from within and outside national government, with participants from  
32  
33 government and non-government organizations (multilateral organizations, bilateral  
34  
35 organization, academic institutions working in the area on MNDs and health). (Table 1)  
36  
37  
38

39  
40 Potential participants were identified through a number of different sources: 1) literature  
41  
42 relating to micronutrients and health to identify the range of key institutions, 2) input from key  
43  
44 opinion leaders working in nutrition and health in Senegal to identify individuals from these  
45  
46 institutions 3) and snowball sampling, whereby participants were asked whether they could  
47  
48 recommend others who may be relevant to the study. Fifteen key institutions were **initially**  
49  
50 identified and potential participants representing these institutions were approached in person or  
51  
52 by email and/or telephone in order to set up interviews. Letters of introduction were then  
53  
54 emailed informing participants of the purpose of this study and seeking their consent to  
55  
56  
57  
58  
59  
60

1  
2  
3 participate. All fifteen individuals approached agreed to be interviewed for the study. Although  
4  
5 the participants purposely represent a diverse range of organizations, they share common  
6  
7 interests and knowledge in nutrition and health; they were also high-ranking representatives  
8  
9 holding leadership positions in their organizations.  
10  
11

12  
13 Semi-structured interviews were conducted in the capital Dakar at the offices of the  
14  
15 participants (except for one interview conducted in the United States by telephone) in the  
16  
17 summer of 2010. Informed consent was obtained verbally at the start of the interview. These  
18  
19 interviews were guided by a prepared survey instrument developed exclusively for this study,  
20  
21 although key experts were encouraged to discuss the issues pertaining to MNDs from their  
22  
23 perspectives. The survey included one question designed to gauge the perceived level of  
24  
25 political priority for MNDs using a Likert scale. Interviews lasted around one to two hours.  
26  
27 When possible and permitted interviews were recorded, otherwise contemporaneous notes were  
28  
29 taken which were then immediately written up following the interview. Interviews were  
30  
31 primarily carried out in English, although in some interviews a mixture of English and French  
32  
33 was used.  
34  
35  
36  
37

38  
39 Each of the recorded interviews was transcribed. The interview transcripts and notes were  
40  
41 examined and content analysis performed from which themes relevant to the research question  
42  
43 identified. These were coded, applying an emic coding approach, based on methodology based  
44  
45 on grounded theory.[19] In order to verify the themes that arose, sections of interview  
46  
47 transcripts were also reviewed by other researchers (students enrolled in either masters or  
48  
49 doctoral degree programs taking a qualitative methods course) during the data analysis stage to  
50  
51 confirm the reliability of the coding and emergent themes during this inductive process.  
52  
53  
54  
55  
56  
57  
58  
59  
60

1  
2  
3  
4  
5  
6  
7  
8  
9  
10  
11  
12  
13  
14  
15  
16  
17  
18  
19  
20  
21  
22  
23  
24  
25  
26  
27  
28  
29  
30  
31  
32  
33  
34  
35  
36  
37  
38  
39  
40  
41  
42  
43  
44  
45  
46  
47  
48  
49  
50  
51  
52  
53  
54  
55  
56  
57  
58  
59  
60

These data was then entered into a spreadsheet, where the themes from internal stakeholders (from within the national government institutions) and external stakeholders (from outside national government) were grouped separately. This spreadsheet facilitated further analysis and identification of the perceived factors that facilitated or obstructed political priority for micronutrients.

This study was approved by the Institutional Review Board of Harvard School of Public Health.

## RESULTS

The perceived level of political priority for MNDs on the national health agenda varied between participants, both within and outside national government. When asked to estimate the current level of priority (very low/low/medium/high/very high), the level of priority for internal stakeholders ranged from “very low” to “high,” and for external stakeholders ranged from “low” to “high.” Internal stakeholders were more likely to rank the level of priority afforded to MNDs as “medium” compared to “high” from external stakeholders. Participants from institutions whose mission was primarily related to nutrition and MNDs were more likely to perceive that MNDs occupied a lower level of priority on the national development agenda.

Several themes emerged from the data analysis, revealing the factors affecting the level of national priority afforded to MNDs, and factors affecting the implementation of MNDs policies. These were classified into facilitating and impeding factors, and ranked according to the frequency with which these were discussed. Facilitating factors were those that promote the creation and/or maintenance of political priority for MNDs, whereas impeding factors were those



1  
2  
3 that curtailed development of political priority for MNDs. These factors are summarized in  
4  
5 **Table 2**, and detailed below.  
6  
7

8  
9  
10 **Factors facilitating agenda setting for micronutrient deficiencies:**  
11

12  
13 **Multiple stakeholders to collectively advocate for the issue**  
14

15 As in many low and middle-income countries, a large network of stakeholders work in  
16 nutrition in Senegal. All participants discussed the complexity of the partnerships between  
17 stakeholders working in MNDs and the necessary coordination required to achieve results in this  
18 sector. This required close coordination between the various divisions in the lead ministry  
19 (Ministère de la Santé, de la Prévention et de l'Hygiène Publique, MOH), between the MOH and  
20 external stakeholders, and between external stakeholders. The benefits of multiple stakeholders  
21 working towards the same goals were highlighted, both in collectively generating attention for  
22 the issue, capitalizing on their comparative strengths and technical capabilities to champion the  
23 issue with national policymakers. This was enabled by the shared understanding of the issue and  
24 aligned narrative.  
25  
26  
27  
28  
29  
30  
31  
32  
33  
34  
35  
36  
37  
38

39 For example, one external institution saw advocacy for MNDs as critical, stating this as  
40 part of their mission to increase priority for micronutrients: *“the key is to raise awareness and*  
41 *build capacity in the ministry, and to help provide the resources to integrate this [MNDs] into*  
42 *day to day delivery...by working with other partners we can drive the government to deliver.”*  
43  
44  
45  
46  
47

48 The technical expertise and practical assistance from external stakeholders provided great  
49 support for this issue both at the policy and implementation level. Both internal and external  
50 stakeholders commented on the benefits of working together. The close community of technical  
51 experts allowed for sharing of knowledge and best practices, and these stakeholders were  
52  
53  
54  
55  
56  
57  
58  
59  
60

1  
2  
3 therefore able to come together to generate a more focused and combined approach to advocate  
4  
5 for MNDs to have higher priority of the government agenda.  
6  
7  
8  
9

### 10 **Availability of MND indicators to raise awareness and quantify issue severity**

11  
12 Universally participants raised the importance of credible indicators in measuring MNDs  
13 severity and in evaluating and quantifying the impact of programmatic interventions. The  
14 Senegal Demographic and Health Survey (DHS), a nationally representative survey which has  
15 specific indicators relating to MNDs, was frequently referred to, which may have also reflected  
16 the fact that the MOH and other stakeholders were actively preparing for implementation of the  
17 next survey.  
18  
19  
20  
21  
22  
23  
24  
25  
26

27 The availability of data was also seen as important to raising awareness of and advocating  
28 for the issue of MNDs. For example, one external stakeholder explained: *“Senegal, is trying to*  
29 *move forward in its development. They [MOH] are trying to look more at the indicators, for*  
30 *example malnutrition is high, and so therefore they want to change this... Therefore there is high*  
31 *priority of nutrition in the country...”* The timeliness of such data was also important, as one  
32 internal stakeholder mentioned: *“fresh country results are important.”* Other internal and  
33 external stakeholders discussed the challenges facing the delivery of timely, complete and  
34 accurate data from the local level to the ministry and other stakeholders. Participants commonly  
35 referred to indicators relating to anemia (iron deficiency is a major cause of anemia) and Vitamin  
36 A, only rarely did they directly comment on iodine and zinc, and none commented directly on  
37 folic acid deficiency.  
38  
39  
40  
41  
42  
43  
44  
45  
46  
47  
48  
49  
50  
51  
52

53 Compared to interest with the Millennium Development Goals (MDG) indicators, interest  
54 in MNDs indicators by policymakers was seen as lacking. As another participant commented:  
55  
56  
57  
58  
59  
60

1  
2  
3 “MDG indicators are on high-level documents and it helps to get financing for these activities  
4 and it also helps the government to be aware of nutrition. It was a very good idea [laughs]. But  
5  
6 for micronutrients it is lacking, maybe we could improve this... We could have indicators  
7  
8 involving micronutrients.”  
9  
10  
11  
12  
13  
14

### 15 **Transnational advocacy activities around MNDs**

16  
17 On the whole participants felt that global policy agendas and policy documents, such as  
18 the Millennium Development Goals, ‘United Call to Action on Vitamin and Mineral  
19 Deficiencies’ or ‘Repositioning Nutrition as Central to Development’ [20], did influence the  
20 Senegalese national health policy agenda as it relates to nutrition and MNDs. The main  
21 mechanism for this was thought to be through financial and technical resources driven by  
22 external stakeholders.  
23  
24  
25  
26  
27  
28  
29  
30

31  
32 Commitments to achieve the MDGs helped to align different stakeholders working in  
33 health as to the importance of nutrition in achieving these goals, which has also had a positive  
34 impact on addressing micronutrient deficiencies as well. One internal participant said “Nutrition  
35 has a role to play in all the [Millennium Development] Goals. It is very important. I think at the  
36 beginning [of the MDG process] the role of nutrition was not that clear, but now things are  
37 different...For women and children, it is very very very important to achieve the MDGs.”  
38  
39  
40  
41  
42  
43  
44  
45

46 Transnational global health activities have helped with the advocacy for the role of nutrition; one  
47 participant expressed this saying, “For MNDs and nutrition globally, we use *The Lancet* to talk  
48 with the authorities. We use the global action plan for nutrition. It is a good way, if we use what  
49 is going on at the international level in our countries, all those results and all those information  
50 as advocacy materials to get political will.” Another stated that “with the global agenda, there is  
51  
52  
53  
54  
55  
56  
57  
58  
59  
60

1  
2  
3 *evaluation and therefore things are improving,*” indicating the transnational influence of  
4  
5 monitoring and evaluation and achieving targets.  
6  
7

8 Senegal signed up to the Call to Action on vitamin and micronutrient deficiencies in  
9  
10 January 2010. Support for this came from the highest level within the lead ministry with the  
11  
12 Minister of Health and Prevention in Senegal joining with other key stakeholders to launch the  
13  
14 report, “Investing in Senegal's Future: A United Call to Action on Vitamin and Mineral  
15  
16 Deficiencies.” This report specifically calls for increased commitment to MNDs, together with  
17  
18 the investment in sustainable partnerships between stakeholders. [11] Although none of the  
19  
20 internal stakeholders thought that this had impact on behavior, the impact perceived by external  
21  
22 stakeholders thought that this had impact on behavior, the impact perceived by external  
23  
24 stakeholders was mixed. For example, one external stakeholder commented, “*I think that this*  
25  
26 *[Call to Action] had impact. It reinforced for all stakeholders the importance of micronutrients.*  
27  
28 *There was a real impact and the advantage is that this is the way to advance the agenda and to*  
29  
30 *emphasize the importance.*” Other external stakeholders thought that the impact was minimal or  
31  
32 hard to gauge. Although the severity of MNDs gained the attention of policymakers at the time  
33  
34 of the launch, translating this into successful implementation was the main barrier identified by  
35  
36 external stakeholders, especially those involved with implementation.  
37  
38  
39  
40  
41  
42

#### 43 **Factors impeding agenda setting for micronutrient deficiencies:**

44  
45 From stakeholder interviews, five key factors were identified that seemed to hinder generation of  
46  
47 political priority for MNDs; these are summarized below.  
48  
49

#### 50 **Issue invisibility: lack of awareness among policymakers and civil society**

51  
52 Stakeholders commented on the particular challenge relating to issue visibility and the  
53  
54 “hiddenness” of MNDs. This extended from policymakers to civil society. As one external  
55  
56  
57  
58  
59  
60

1  
2  
3 stakeholder asked, *“Are all the stakeholders aware of the importance of micronutrients? For*  
4 *health? Economic growth? Regarding the well-being of the nation?. It is a question of*  
5 *awareness and political will, and maybe a question of difference sectors working all together.”*

6  
7  
8  
9  
10 Similarly, another external stakeholder commented, *“At the policy level, it is a matter of*  
11 *awareness, information, and education on the issue;”* while another stated that *“At the ministry,*  
12 *there is no decision maker who asks for micronutrient indicators, say compared to*  
13 *immunizations etc.”* This was contrasted to other global health issues such as maternal mortality  
14 and HIV/AIDS where the disease burden and impact were more “visible.”

15  
16  
17  
18  
19  
20  
21  
22 Universally stakeholders interviewed agreed that there is a lack of public awareness about  
23 nutrition and micronutrients, stating that there has been little attempt to mobilize civil society to  
24 press for progress in this issue. Some marketing campaigns are in place and were mentioned,  
25 such as fortified foods for infants, and national alliances to promote food fortification, but their  
26 impact is not known. *This in part reflects the subclinical presentation of MNDs.* As one internal  
27 participant noted, *“If you have micronutrient deficiencies you can’t see it. Say you have anemia*  
28 *– when you go to the health system you are given medicine but you can’t see it - You can have*  
29 *anemia all your life and not know it. The consequences are not visible most of the time.”*

30  
31  
32  
33  
34  
35  
36  
37  
38  
39  
40  
41 Participants discussed the need to encourage public awareness to the public: for example, *“the*  
42 *beneficiaries[civil society] also need to see this and the benefits of results ... you know for*  
43 *comparison, for roads or for the wheels for water, they see it – they know it – you see that you*  
44 *need it for everything - they see the health huts and health centers and see that. But for*  
45 *micronutrients – you don’t see it.”* Thus for MNDs, the characteristics of the issue and the  
46  
47  
48  
49  
50  
51  
52  
53  
54  
55  
56  
57  
58  
59  
60  
“hidden” presentation has implications for its visibility at the policy level and for civil society.

### Issue complexity: multisectoral solutions required to address MNDs

Another challenge participants identified is the multisectoral nature of the necessary interventions to deal with MNDs. This spans ministries and although there is a specific taskforce on addressing malnutrition in Senegal, coordinating a response is difficult. Furthermore, there were inconsistencies in the perceptions of who should take leadership and responsibility for this issue, and what the policy solutions should be. One internal stakeholder expressed the opinion that the MOH should not be the main overseer of nutrition, as prevention (rather than treatment) should be championed and therefore it should fall most under the remit of the Ministries of Agriculture, Industry and Education. He indicated *“It is a multisectoral issue, maybe health is doing its role, but there are other sectors that may not be doing so. I think that in Senegal we need a better approach. We have not yet defined what it should be... There are different sectors with different responsibilities, and we need to do this exercise to define the issue and then the level of priority. For example, with anemia, you have to work on the agriculture, industry – they all have responsibilities and roles – many other sectors - as the MOH is there to see the problems – it just works on the end.”* Another participant commented on collaboration between internal and external sectors, saying *“We have to join efforts between the MOH and industry and the private sector – health alone won’t be able to reduce this significantly. The MOH works on the consequences of MNDs, they are at the end, and it’s a big deal for the MOH.”*

These views reflect the difficulties that extend from the multisectoral nature of the issue in terms of coordinating the complex array of actors working in nutrition and health, and who should take responsibility for overseeing this issue, both in terms of prevention versus treatment and public versus private sector involvement. This is further complicated by the different agendas and priorities that these external partners may have. As one internal stakeholder

1  
2  
3 commented, “*sometimes you face difficulties as they have different agendas, so you have to have*  
4 *a good sense of flexibility and adaptability as an organization.*” Operationally, coordination  
5  
6 means that much time is spent in meetings and significant ministerial capacity is reportedly spent  
7  
8 “*in meetings and doing report preparation, rather than the actual work.*” One external  
9  
10 stakeholder commented, “*If you go to into X [referring to a MOH Division], no-one else is there*  
11  
12 *as they are all out with different partners. It is very difficult to manage.*” All external  
13  
14 stakeholders interviewed however were sympathetic to the limitations of the ministerial capacity  
15  
16 to deal with competing priorities and the burden of work, given the limited human and  
17  
18 operational resources.  
19  
20  
21  
22  
23  
24  
25  
26  
27

### 28 **Lack of adequate resources to support MNDs: trapped in a ‘low priority’ cycle**

29  
30 Lack of financial, human and physical resources to support MNDs initiatives and their  
31  
32 scaling up were stated as a major challenge to actually realizing higher political priority for  
33  
34 MNDs. Both internal and external stakeholders commented on lack of resources compounding  
35  
36 the difficulty of integrating MNDs policy solutions into the day to day delivery of existing  
37  
38 programs, which meant that the issue was stuck as a low priority issue,[21] with lack of  
39  
40 budgetary commitment to support advocacy efforts for higher prioritization of the issue.  
41  
42  
43

44 The interviews with the internal stakeholders revealed four challenges: firstly, the  
45  
46 inadequate financial commitments to MNDs from the government, which made the MOH very  
47  
48 dependent on external partners to support this agenda. Although necessary, this, in their opinion,  
49  
50 had limited the ability to develop and implement a longer term vision for MNDs. Secondly,  
51  
52 [that] “*the resources are not sufficient to implement the programs, [and thirdly,] the other is the*  
53  
54 *coordination of existing resources. We need to use these efficiently, with better coordination of*  
55  
56  
57  
58  
59  
60

1  
2  
3 *the existing resources. We have to do better, and put in enough effort to use resources*  
4 *rationally...It is really important to coordinate better – interventions and resources”.* Fourthly,  
5  
6 financing vertical programs reportedly compromised a more holistic approach to tackle MNDs,  
7  
8 and also limited the flexibility for resource allocation.  
9  
10

11  
12 More positively, new global funds earmarked for nutrition, and the collective support of  
13  
14 the external stakeholders meant that gaps in service delivery where possible could be addressed  
15  
16 by different partners working together.  
17  
18  
19  
20  
21

### 22 **Lack of a champion to advocate for the issue and institutional weakness of the lead** 23 **ministry**

24  
25  
26  
27 A specific issue raised was the lack of an individual or champion to “push” for MNDs  
28  
29 from within the ministry. Building on the preceding theme, lack of resources were felt to further  
30  
31 compound the effectiveness of the lead institution. Six out of the eight external stakeholders  
32  
33 identified poor leadership *capacity* of the MOH as an obstructing factor facing priority setting for  
34  
35 MNDs and the development and implementation of related policy solutions, whereas only two of  
36  
37 seven internal stakeholders raised this issue. Furthermore, stakeholders commented on the lack  
38  
39 of a clear strategic plan for MNDs, with limited leadership capacity to manage the necessary  
40  
41 multisectoral response and coordinate multiple stakeholder involvement for MNDs. One  
42  
43 external stakeholder commented: *“This [MNDs] requires a high level of leadership from the*  
44  
45 *ministry .... there is a certain level of leadership, but this needs to be developed more to bring all*  
46  
47 *available resources to implement the interventions priority, by priority, which should be defined*  
48  
49 *by the MOH. This is really important...”* Similarly, another external stakeholder stated, *“It is a*  
50  
51 *question of leadership. They [MOH] need to have a very strategic plan, it is very important,*  
52  
53  
54  
55  
56  
57  
58  
59  
60



1  
2  
3 *because with the implementation plan, and with monitoring and evaluation, it is important for*  
4 *the MOH to coordinate all the support. It is not easy [laughs] ...it is a challenge.”*  
5  
6  
7

8 The internal stakeholders who specifically commented on leadership from the lead  
9 institution did however state how they are attempting to address this issue and build up the  
10 ministerial leadership capacity through various training initiatives.  
11  
12  
13  
14

### 15 16 17 **Challenge of demonstrating effectiveness of interventions for MNDs to reinforce advocacy** 18 **efforts** 19

20  
21  
22 Despite the theoretical existence of effective interventions for MNDs, implementation  
23 was identified by participants as a key challenge in the Senegalese context. The need to show  
24 the effectiveness of interventions was critical, yet difficulties with data and information systems  
25 hindered pursuit of this. As an internal stakeholder pointed out, *“We have many problems with*  
26 *data. Data is very important to identify better interventions and to allocate resources...we have*  
27 *some problems, especially at the health facilities level to monitor here – there are sometimes*  
28 *lack of materials to collect such data, and I know the ministry is trying to improve this fact. If we*  
29 *lack data, we will always have problems. This is important for monitoring key indicators, and*  
30 *necessary for operations... All partners are interested in this.”* The problems with data  
31 collection identified by interviewees included, the lack of supervision at the community level for  
32 collecting data, poor reporting resulting from limited training, capacity, lack of job awareness  
33 and lack of transfer of data centrally leading in information and data loss.  
34  
35  
36  
37  
38  
39  
40  
41  
42  
43  
44  
45  
46  
47  
48  
49

50 Stakeholders reiterated the importance of demonstrating success to strengthen advocacy:  
51 *“For advocacy you need results. The best way to advocate is to show results and that it works.*  
52 *At the moment we don't have the evidence to show this... it is very difficult.”* The pressure to  
53  
54  
55  
56  
57  
58  
59  
60

gather data for monitoring and evaluation to show the effectiveness of their interventions was highlighted by external stakeholders working on the implementation side. Evaluating the impact of programs was seen as important for securing continued donor support. *“Results can help the process to improve. With results, then they [partners and donors] will come. Each donor or partner wants results. With results, then they will come. It’s not complicated,”* an internal stakeholder explained.

## DISCUSSION

### Factors influencing national political priority for micronutrient deficiencies

This qualitative study identified several factors affecting the political prioritization process for micronutrient deficiencies from the perspective of key experts working in this field. In doing so, it offers some explanation as to why the issue of MNDs has struggled to gain political attention and make it onto the policy agenda. Interestingly, this study also identified that the perceived level of political priority for MNDs varied considerably between key stakeholders involved in the field of nutrition and health in Senegal. This may reflect the perceptions of the individuals representing these organizations, or may be the result of, or consequence of, how the issue of MNDs is understood and framed by the national policy community. This qualitative analysis therefore raises questions into the complex relationship between perceptions of political priority and the agenda setting process for MNDs.

Relating the study’s findings to the existing theoretical literature yields some additional insights. For an issue to gain political priority on the government agenda, Kingdon’s theory of agenda setting argues that, three independent streams need to converge: the problem stream, where an issue becomes perceived as a problem that needs to be and can be addressed compared

1  
2  
3 to other competing priorities; the policy stream, where a set of alternative policy solutions are  
4 proposed to address the problem; and the politics stream, where political events create a window  
5  
6 of opportunity for policy reform.[10]  
7  
8  
9

10 In this case, in the problem stream, credible indicators that objectively quantified the  
11 severity of the issue were used by the policy community to highlight the prevalence of MNDs.  
12  
13 This was supported by advocacy efforts that used calculations of DALYs lost due to MNDs and  
14 the benefit:cost ratios to support investing in reducing micronutrient deficiencies. However,  
15  
16 several factors impeded progress – these mainly relate to the characteristics of the problem or  
17  
18 issue itself. First, the “hiddenness” of MNDs diminished the visibility of this issue, posing a  
19  
20 challenge to MNDs commanding the sustained attention of civil society and policymakers. This  
21  
22 is in contrast, for example, to HIV/AIDS where the impact on people, societies and economies  
23  
24 are highly visible, and facilitated generating attention and support for the issue.[22] Second, the  
25  
26 typical chronic nature of MNDs does not command a sense of urgency to act, for example  
27  
28 compared to acute epidemics or famines. Third, although global evidence to support effective  
29  
30 interventions were available, the lack of country-level evidence and inability to demonstrate  
31  
32 clear results from policy and programmatic actions impeded advocacy efforts to address the  
33  
34 issue. Policymakers, in order to get behind the issue need to be convinced of its feasibility, with  
35  
36 investment in political capital bringing about positive results rather than taking the risk of  
37  
38 backing more complex or challenging issues.  
39  
40  
41  
42  
43  
44  
45  
46  
47

48 In the policy stream, we see that the policy community, although diverse, was cohesive.  
49  
50 All stakeholders commented on the collective efforts in advocating for MNDs, and how this  
51  
52 strengthened their ability, harnessing their individual strengths, to champion the issue. It was  
53  
54 also opportune to champion all MNDs together as one group, rather than individual deficiencies.  
55  
56  
57  
58  
59  
60

1  
2  
3 However, two impeding factors were identified. First, the institutional weakness of the lead  
4 ministry, which lacked resources and capacity to take on this issue; and, second, the complexity  
5 of the policy solutions required to address MNDs. Stakeholders were agreement that a  
6 multisectoral response **with multiple solutions** was required, with the need for multi-stakeholder  
7 involvement to address different micronutrient deficiencies. This added another layer of  
8 complexity, both technically and operationally, to delivering an effective **multifaceted** response.  
9 In the Senegalese setting, there were difficulties in ensuring the timeliness, accuracy and  
10 completeness of data to demonstrate the effectiveness of policy responses. This was compounded  
11 by the limited leadership capacity of the lead ministry to coordinate stakeholders and activities,  
12 to maximize the potential of such partnerships and to bring other ministries to the table to tackle  
13 the issue.

14  
15 In the politics stream, no clear political transitions were discussed by stakeholders that  
16 could present a window of opportunity for reform. Nor was there evidence of a policy advocate,  
17 a person who was actively championing the issue of MNDs, or of civil society organizations  
18 pushing for this problem to be addressed. The concentration of MNDs among vulnerable groups  
19 of women and children is critical: these groups are less politically empowered and have limited  
20 electoral power to command priority from policymakers. Furthermore, as many of those afflicted  
21 by MNDs are unaware of the disease burden, it is even more challenging to mobilize interest  
22 groups around this issue.

23  
24 **Because of the impeding factors in the each stream, this analysis demonstrates why**  
25 **MNDs have failed to sustainably command the attention of decision makers. Application of**  
26 **Kingdon's theory provides a useful framework for analysis, however it has limitations. First, as it**  
27 **is based on national agenda setting in the context of the American political system, it may not**

1  
2  
3 capture the different dynamics and complexity of political systems in low and middle-income  
4 countries.[23] Second, as this study demonstrates, it is perhaps over-simplistic: facilitating and  
5  
6  
7  
8  
9  
10  
11  
12  
13  
14  
15  
16  
17  
18  
19  
20  
21  
22  
23  
24  
25  
26  
27  
28  
29  
30  
31  
32  
33  
34  
35  
36  
37  
38  
39  
40  
41  
42  
43  
44  
45  
46  
47  
48  
49  
50  
51  
52  
53  
54  
55  
56  
57  
58  
59  
60

capture the different dynamics and complexity of political systems in low and middle-income countries.[23] Second, as this study demonstrates, it is perhaps over-simplistic: facilitating and impeding factors often overlap and interact between in the three streams, and the agenda-setting stage of the policy cycle may also interact with other stages, such as implementation. Third, this theory of national agenda setting does not include interactions between global agenda-setting activities and national-level processes.

### **Global agenda setting activities influencing national policy processes**

The importance of global agenda-setting activities at the national level was a key theme raised by this analysis. This theme has been raised in the applied literature examining the priority of global health issues on national agendas.[11,24,25,26] Shiffman highlighted the importance of ‘transnational influences’ whereby norm promotion and resource provision can influence the degree to which an issue appears on the national agenda.[11]

In the case of MNDs in Senegal, several themes around global influences were highlighted. First, was the use of internationally-recognized evidence base on effective solutions for MND, (for example, Lancet series on nutrition) which resonated well with the policy community, giving them cogent arguments to support their advocacy effort with decision makers. Second, was the impact of donor funding on influencing national priorities. Although, some stakeholders criticized the lead ministry for not taking command, stakeholders also commented on the role of external donors who influence the agenda through their own priorities and resource allocation. Donor agendas were purported to undermine the empowerment of the ministry to take charge of deciding which competing priorities should receive funding allocation. Third, was the influence of global advocacy for MND: the local launch of the *Call to Action on*

1  
2  
3  
4  
5  
6  
7  
8  
9  
10  
11  
12  
13  
14  
15  
16  
17  
18  
19  
20  
21  
22  
23  
24  
25  
26  
27  
28  
29  
30  
31  
32  
33  
34  
35  
36  
37  
38  
39  
40  
41  
42  
43  
44  
45  
46  
47  
48  
49  
50  
51  
52  
53  
54  
55  
56  
57  
58  
59  
60

*Vitamin and Mineral Deficiencies* provided a forum to garner support and galvanize how the issue was framed both among the policy community and to broader audiences, including the private sector, who through public-private partnerships, particularly those relating to food fortification, have an important role to play in addressing MNDs. While the issue of MND gained the attention of policymakers at the time of the launch, none of the internal stakeholders thought that this had impact: the challenge of translating this into sustained political prioritization for MNDs remained.

### Limitations

This qualitative study has limitations. As with all case studies, it is not possible to generalize these findings to other contexts. However, it is likely that many of the findings are transferable to other settings, particularly the broader themes relating to issue characteristics and issue complexity of MNDs. In other low and middle-income countries burdened with MNDs, several of the other themes may also resonate, such as those relating to multisectoral coordination required to deliver solutions and advocacy through a policy champion or entrepreneur. Second, are issues relating to the study methodology. Not all interviews were recorded which may have limited the ability to delineate nuances available from transcribed interviews. Also, due to operating in two languages at times, some subtle understanding of issues may not have been clearly denunciated, especially as many of the participants were not using their native language. Although stakeholders interviewed for this study represent the array of institutions working in micronutrients, it may be possible that other representatives from these same institutions or other institutions or sectors, such as from finance and agriculture, could have added further insights to the study's findings. No representative from the private sector was

1  
2  
3 interviewed due to logistical reasons, which was an omission. Also, the data collection and  
4  
5 analysis was conducted in 2010, so the study findings may be less relevant to today's context.  
6  
7  
8 Third, the author's positionality having been introduced with a letter of introduction from the  
9  
10 lead ministry, and being an outsider may have affected how participants responded. Moreover,  
11  
12 personal connections through shared disciplinary backgrounds (physicians or researchers) with  
13  
14 different participants may have differentially altered their responses, for example, greater  
15  
16 openness with the author because of shared bonds. Fourth, as the data collection and analysis  
17  
18 was carried out by one researcher, this may have increased the likelihood of bias. To mitigate  
19  
20 this, interview transcripts were independently reviewed by other researchers to confirm the  
21  
22 reliability of the coding and themes emerging from the data.  
23  
24  
25  
26  
27  
28

### 29 **Implications of the study**

30  
31 This analysis does offer some insight into the factors affecting agenda setting which  
32  
33 could help with devising political strategies to help prioritize addressing MNDs, at both national  
34  
35 and global levels. An interesting finding was that many stakeholders interviewed were not  
36  
37 acutely cognizant of political process relating to agenda setting for health policy, and were  
38  
39 interested in this research question and the potential implications of this research. To this end, it  
40  
41 is also important for the policy and technical community to be aware of the politics around the  
42  
43 policy process and build capacity to navigate the political policy process.[27] This could take  
44  
45 advantage of the existing methods and tools that already exist to conduct a political analysis for  
46  
47 food and nutrition security,[26] and generate recommendations to enhance the political  
48  
49 feasibility of efforts to champion MNDs. This study revealed the absence of a political strategy  
50  
51 to advance prioritization of MNDs.  
52  
53  
54  
55  
56  
57  
58  
59  
60

1  
2  
3  
4  
5  
6  
7  
8  
9  
10  
11  
12  
13  
14  
15  
16  
17  
18  
19  
20  
21  
22  
23  
24  
25  
26  
27  
28  
29  
30  
31  
32  
33  
34  
35  
36  
37  
38  
39  
40  
41  
42  
43  
44  
45  
46  
47  
48  
49  
50  
51  
52  
53  
54  
55  
56  
57  
58  
59  
60

Some broad recommendations to increase the political priority of MNDs could include actions to: identify and support a champion to strongly advocate for micronutrient deficiencies; promote greater attention to micronutrient deficiencies among civil society, for example, through education activities or through mass media and social media, to increase awareness of the issue and its consequences; support policy communities to work together to devise strategies that best capitalise on their collective strength and doing so push national officials to commit to specific actions; take advantage of focusing events both nationally and globally that could promote the issue; focus on carefully monitoring and evaluating MND policies and programmes, and documenting successes so as to demonstrate effective and feasible policy solutions to demonstrate to policymakers. These strategies would need to be tailored to the specific context and policy environment around MNDs.

### **Future study of global and national political prioritization processes for global health issues**

This study contributes to the growing literature that attempts to understand the variation in the priority and attention granted to different global health issues, using the hitherto unstudied case study of micronutrient deficiencies. As more and more global and national actors vie to promote priority for their valued issues, the process of priority setting at the national level is becoming increasingly complex. This raises a number of questions and issues. On an academic level, it exposes the shortcoming of existing theories to understand the policy process for global health, with need to develop theories or adapt existing theories to help shape our understanding of global health agenda-setting. On a practical level, it raises the broader issue of the implications of siloed efforts to promote different agendas within global health. While there are



1  
2  
3 advantages in advocating for specific issues, it is not clear whether fragmented advocacy efforts  
4  
5 in nutrition, for example, for MNDs or exclusive breastfeeding or child overweight and obesity,  
6  
7 detract from bringing about more integrated and coordinated progress in nutrition or  
8  
9 development more broadly. Moreover, it is unknown whether competing priorities vying for  
10  
11 attention result in “attention fatigue” and whether national policymakers become refractory to  
12  
13 repeated calls to action. Further theoretical and applied work could explore these issues.  
14  
15  
16  
17  
18  
19  
20  
21  
22  
23  
24  
25  
26  
27  
28  
29  
30  
31  
32  
33  
34  
35  
36  
37  
38  
39  
40  
41  
42  
43  
44  
45  
46  
47  
48  
49  
50  
51  
52  
53  
54  
55  
56  
57  
58  
59  
60

**Table 1: Characteristics of study participants interviewed for this study**

| <b>Stakeholder</b>                            | <b>Organization</b>            | <b>n</b>  |
|-----------------------------------------------|--------------------------------|-----------|
| Internal stakeholders<br>(within government)  | Governmental institutions      | <b>7</b>  |
|                                               | National executive agency      | <b>1</b>  |
| External stakeholders<br>(outside government) | Multilateral institutions      | <b>3</b>  |
|                                               | Bilateral institutions         | <b>1</b>  |
|                                               | Non-governmental organizations | <b>2</b>  |
|                                               | Academia/clinical medicine     | <b>1</b>  |
| <b>Total</b>                                  |                                | <b>15</b> |

**Table 2: Identified factors affecting agenda setting for micronutrient deficiencies (MNDs)**

| <b>Factors facilitating agenda-setting for MNDs</b>                                                | <b>Factors impeding agenda-setting for MNDs</b>                                                |
|----------------------------------------------------------------------------------------------------|------------------------------------------------------------------------------------------------|
| Multiple stakeholders, with aligned framing of the problem, to collectively advocate for the issue | Issue invisibility: lack of awareness among policymakers and civil society.                    |
| Availability of MND indicators to raise awareness and quantify issue severity                      | Issue complexity: multisectoral solutions required to address MNDs.                            |
| Transnational advocacy activities around MND                                                       | Lack of adequate resources to address MND: trapped in a 'low priority' cycle.                  |
|                                                                                                    | Lack of a champion to advocate for the issue and institutional weakness of the lead ministry   |
|                                                                                                    | Challenge of demonstrating effectiveness of interventions for MND to support advocacy efforts. |

## REFERENCES

1. Unicef (2013) Improving child nutrition: The achievable imperative for global progress. New York, NY, USA: UNICEF: 18.
2. Initiative M (2009) Investing in the future: A united call to action on vitamin and mineral deficiencies Ottawa: Micronutrient Initiative.
3. Ezzati M, Lopez AD, Rodgers AA, Murray CJL (2004) Comparative quantification of health risks : global and regional burden of disease attributable to selected major risk factors. Geneva: World Health Organization. 2 v. (2248 p.)+ v.2243 in 2241CD-ROM . p.
4. Murray CJ, Vos T, Lozano R, Naghavi M, Flaxman AD, et al. (2012) Disability-adjusted life years (DALYs) for 291 diseases and injuries in 21 regions, 1990-2010: a systematic analysis for the Global Burden of Disease Study 2010. *Lancet* 380: 2197-2223.
5. Boy E, Mannar V, Pandav C, De Benoist B, Viteri F, et al. (2009) Achievements, challenges, and promising new approaches in vitamin and mineral deficiency control. *Nutrition Reviews* 67: S24-S30.
6. Consensus C (2012) Expert panel findings. Copenhagen Consensus 2012. . Washington, DC: Copenhagen Consensus Center, .
7. Agence Nationale de la Statistique et de la Démographie (ANSD) [Sénégal] eII (2012) Enquête Démographique et de Santé à Indicateurs Multiples au Sénégal (EDS-MICS) 2010-2011. . Calverton, Maryland, USA:: ANSD et ICF International.
8. Walt G, Shiffman J, Schneider H, Murray S, Brugha R, et al. (2008) 'Doing'health policy analysis: methodological and conceptual reflections and challenges. *Health Policy and Planning* 23: 308.
9. Shiffman J, Smith S (2007) Generation of political priority for global health initiatives: a framework and case study of maternal mortality. *The Lancet* 370: 1370-1379.
10. Kingdon J (2002) *Agendas, Alternatives, and Public Policies* (Longman Classics Edition): Longman Publishing Group.
11. Shiffman J (2007) Generating political priority for maternal mortality reduction in 5 developing countries. *American journal of public health* 97: 796-803.
12. Shiffman J (2010) Issue attention in global health: the case of newborn survival. *Lancet* 375: 2045-2049.
13. Geneau R, Stuckler D, Stachenko S, McKee M, Ebrahim S, et al. (2010) Raising the priority of preventing chronic diseases: a political process. *The Lancet* 376: 1689-1698.
14. Shiffman J (2003) Generating political will for safe motherhood in Indonesia. *Social Science & Medicine* 56: 1197-1207.
15. Hafner T, Shiffman J (2013) The emergence of global attention to health systems strengthening. *Health policy and planning* 28: 41-50.
16. Shiffman J, Quissell K (2012) Family planning: a political issue. *Lancet* 380: 181-185.
17. Initiative M (January 19, 2010) Investing in Senegal's Future: A United Call To Action On Vitamin And Mineral Deficiencies.
18. BENNETT AA (2005) *Case studies and theory development in the social sciences*: Mit Press.
19. Glaser BG, Strauss AL (2009) *The discovery of grounded theory: Strategies for qualitative research*: Transaction Books.
20. Shekar M, Heaver R, Lee Y-K (2005) *Repositioning Nutrition as Central to the Development Agenda: A Strategy for Large Scale Action*: World Bank-free PDF.
21. Natalicchio M (2009) *Carrots and sticks: the political economy of nutrition policy reforms*: World Bank.
22. Shiffman J (2006) HIV/AIDS and the rest of the global health agenda. *Bulletin of the World Health Organization* 84: 923-923.

- 1
- 2
- 3
- 4 23. Court J, Young J (2003) Bridging research and policy: Insights from 50 case studies: Overseas
- 5 development institute (ODI).
- 6 24. Reich MR (1995) The politics of agenda setting in international health: child health versus adult
- 7 health in developing countries. *Journal of international development* 7: 489-502.
- 8 25. Shiffman J, Smith S (2007) Generation of political priority for global health initiatives: a framework
- 9 and case study of maternal mortality. *Lancet* 370: 1370-1379.
- 10 26. Reich MR, Balarajan Y (2012) Political economy analysis for food and nutrition security. HNP
- 11 Discussion PaperWorld Bank and SAFANSI, Washington, DC.
- 12 27. Fox A, Reich M, editors (2013) Political Economy of Reform: The Art of the Feasible. Washington
- 13 D.C>: World Bank Publications.
- 14
- 15
- 16
- 17
- 18
- 19
- 20
- 21
- 22
- 23
- 24
- 25
- 26
- 27
- 28
- 29
- 30
- 31
- 32
- 33
- 34
- 35
- 36
- 37
- 38
- 39
- 40
- 41
- 42
- 43
- 44
- 45
- 46
- 47
- 48
- 49
- 50
- 51
- 52
- 53
- 54
- 55
- 56
- 57
- 58
- 59
- 60

For peer review only

## ACKNOWLEDGEMENTS

The author expresses thanks to the key experts who kindly participated in this study and the Council of Women World Leaders. In addition, the author would like to thank Vanessa Fong, Christina Smiraglia and classmates at the Harvard Graduate School of Education for verifying the data analysis and reviewing earlier drafts of this paper. Finally, the author thanks Donald Halstead for thoughtful comments that greatly contributed to this paper.

## AUTHOR DISCLOSURES

- YB declares no conflicts of interest and no competing interests.
- The authors has completed the Unified Competing Interest form at [www.icmje.org/coi\\_disclosure.pdf](http://www.icmje.org/coi_disclosure.pdf) (available on request from the corresponding author) and declare that YB has no specified relationships with any companies that might have an interest in the submitted work in the previous 3 years; and YB has no non-financial interests that may be relevant to the submitted work.
- The Corresponding Author has the right to grant on behalf of all authors and does grant on behalf of all authors, a worldwide licence to the Publishers and its licensees in perpetuity, in all forms, formats and media (whether known now or created in the future), to i) publish, reproduce, distribute, display and store the Contribution, ii) translate the Contribution into other languages, create adaptations, reprints, include within collections and create summaries, extracts and/or, abstracts of the Contribution, iii) create any other derivative work(s) based on the Contribution, iv) to exploit all subsidiary rights in the Contribution, v) the inclusion of electronic links from the Contribution to third party material where-ever it may be located; and, vi) licence any third party to do any or all of the above.
- This study was approved by the Institutional Review Board of the Harvard School of Public Health. Protocol #: 19491-101. All participants gave informed consent before taking part.
- This study was not supported by a specific grant. The author was a recipient of a Fellowship from the Council of Women World Leaders, Washington D.C. The fellowship program had no role in the study design; in the collection, analysis, and interpretation of data; in the writing of the report; and in the decision to submit the article for publication.
- YB had full access to all of the data in the study and can take responsibility for the integrity of the data and the accuracy of the data analysis. Data sharing: no additional data available.
- YB affirms that the manuscript is an honest, accurate, and transparent account of the study being reported; that no important aspects of the study have been omitted; and that any discrepancies from the study as planned (and, if relevant, registered) have been explained.

## Supplementary material

### Survey instrument<sup>1</sup>

[This was used to guide discussions, but depending on the expertise and role of the participant, this instrument was modified accordingly]

Introduction

Informed Consent

### Background

Position/ Duration of position

Organization's current role in MND

Organization's current strategies/responsibilities in nutrition, anemia and reproductive health:

### KEY QUESTIONS

1. How do you perceive the level of political priority for MND (Micronutrient and Vitamin Deficiencies) on the national health policy agenda in Senegal?  
[Likert scale for different levels of priority: very high-5, high-4, medium-3, low-2, very low-1].
2. How do you perceive the level of political priority for anemia on the national health policy agenda in Senegal?
3. What are the factors affecting political priority for MNDs?
  - a. Enabling
  - b. Obstructing
4. What strategies might be most effective in promoting or sustaining MNDs?
5. What are the factors affecting policy formation?
  - a. Enabling
  - b. Obstructing
6. What are the factors affecting implementation of policies for these causes?
  - a. Enabling
  - b. Obstructing
7. What was the impact of the United Call to Action on MND?
  - a. Perceptions of political will and commitment
  - b. Recommendations and action following this
8. What are the current gaps in policy and implementation relating to MND?
9. Would a national anemia strategy be welcomed and help to influence and coordinate anemia control?

### PLAYERS

10. Can you help me understand the key players in nutrition and health, and how they work together?
11. Who are the policy and implementation leaders?
12. What are their relative powers and positions?

---

<sup>1</sup> Please note other questions relating to the integration of nutrition into reproductive health services were also asked but are not discussed in this paper

- 1  
2  
3  
4  
5  
6  
7  
8
13. Is there synergy? Wasted effort? Gaps? How can this effort be made more effective? (asked separately, if deemed relevant)
  14. What is the current power and position of civil society for these issues?
  15. How does this situation in Senegal compare to other countries?

9  
10

#### GOVERNMENT

- 11  
12  
13  
14  
15  
16  
17  
18  
19
16. What are your perceptions of the government's role in MND? Is it doing enough/too much/too little?
  17. What is your perception of the level of integration of nutrition into MCH services?
  18. Could nutrition/MND/Anemia be better integrated into MCH services? How?
  19. Who are the leaders in generating political priority and implementation?
  20. Can you discuss the intersectoral response to MND/Anemia?

20  
21

#### EXTRA QUESTIONS FOR DISCUSSION

- 22  
23  
24  
25  
26  
27  
28  
29  
30  
31  
32  
33  
34  
35  
36  
37  
38  
39  
40  
41  
42  
43  
44  
45  
46  
47  
48  
49  
50  
51  
52  
53  
54  
55  
56  
57  
58  
59  
60
- Senegal's performance on MDG 1/4/5
  - Availability and access to data, protocols, recommendations to guide policy
  - Perceptions of access to quality delivery platforms for MND
  - Financing, procurement and distribution of MND products
  - Role of academia, journal articles, symposia
